# Supplementary material for: Novel salts and cocrystals of the antifolate drug trimethoprim and their role in the enhancement of solubility and dissolution
Source: Royal Society of Chemistry journal article supplement (doi:10.1039/d2ce01436j), 2023-01-01
Supplement: d2ce01436j1.pdf [file d2ce01436j1.pdf]

## Novel salts and cocrystals of antifolate drug, Trimethoprim and its role in enhancement of solubility and dissolution.

Anuja Venkata Sai Durga Surampudi<sup>a</sup>, Sistla Ramakrishna<sup>b,d</sup>, Alegete Pallavi<sup>c</sup>, Sridhar Balasubramanian<sup>\*a,d</sup>

<sup>a</sup>Centre for X-ray Crystallography, Department of Analytical & Structural Chemistry, CSIR-Indian Institute of Chemical Technology, Tarnaka, Uppal Road, Hyderabad-500007, Telangana, India. E-mail: [bsridhar@iict.res.in](mailto:bsridhar@iict.res.in)

<sup>b</sup>Applied Biology, CSIR-Indian Institute of Chemical Technology, Tarnaka, Uppal Road, Hyderabad-500007, Telangana, India

<sup>c</sup>Department of Analytical & Structural Chemistry, CSIR-Indian Institute of Chemical Technology, Tarnaka, Uppal Road, Hyderabad-500007, Telangana, India

<sup>d</sup>Academy of Scientific and Innovative Research (AcSIR), Ghaziabad-201002, India

**Table S1:** IR spectroscopy

|                               | TMP                                             | T7A  | 5FU              | CAT  | THY  | TMP-T7A          | TMP-5FU          | TMP-CAT          | TMP-THY-H2O                  |
|-------------------------------|-------------------------------------------------|------|------------------|------|------|------------------|------------------|------------------|------------------------------|
| -N-H stretch                  | 3467<br>(asymmetric)<br><br>3315<br>(symmetric) | -    | 3119             | -    | 3746 | 3358<br><br>3293 | 3410<br><br>3143 | 3463<br><br>3358 | 3631<br><br>3437<br><br>3329 |
| -N-H bend                     | 1631<br><br>1591                                | -    | 1505             | -    | 1555 | 1631<br><br>1586 | 1591<br><br>1507 | 1634<br><br>1591 | 1586<br><br>1565             |
| -C=O stretch<br>(carboxylate) | -                                               | 1732 | -                | -    | -    | 1672             | -                | -                | -                            |
| -C(=O)-N-<br>(amide)          | -                                               | 1707 | 1717<br><br>1651 | -    | 1658 | 1705             | 1670<br><br>1646 | -                | 1713<br><br>1648             |
| -O-H<br>(phenolic)            | -                                               | -    | -                | 3444 | -    | -                | -                | 3415             | -                            |
| -O-H (water)                  | -                                               | -    | -                | -    | -    | -                | -                | -                | 3520                         |

**Table S2:**The <sup>13</sup>C-NMR values of all four systems.

| TMP-T7A | TMP-5FU | TMP-CAT | TMP-THY-H2O |
|---------|---------|---------|-------------|
|---------|---------|---------|-------------|

|                                 |                         |                                 |                                   |                                 |                         |                                        |                         |
|---------------------------------|-------------------------|---------------------------------|-----------------------------------|---------------------------------|-------------------------|----------------------------------------|-------------------------|
| <sup>13</sup> C-NMR TMP         | <sup>13</sup> C-NMR T7A | <sup>13</sup> C-NMR TMP         | <sup>13</sup> C-NMR 5FU           | <sup>13</sup> C-NMR TMP         | <sup>13</sup> C-NMR CAT | <sup>13</sup> C-NMR TMP                | <sup>13</sup> C-NMR THY |
| C1-33.47 to 32.88               | C1- 27.95 to 27.89      | C1-33.47 to 33.46               | C1-126.63;126.88 to 126.70;127.02 | C1-33.47 to 33.45               | C1-116.5 to 116.14      | C1-33.47 to 33.46                      | C1-12.28 to 12.28       |
| C2-56.28 to 56.30 & 63.25       | C2-29.96 to 29.87       | C2-56.28 to 56.27               | C2-139.39;141.20 to 139.19;141.44 | C2-56.28 to 56.26               | C2-119.75 to 119.74     | C2-56.28 to 56.27                      | C2-108.16 to 108.18     |
| C3-60.45 to 60.43               | C3-47.68 to 49.08       | C3-60.45 to 60.45               | C3-150.55 to 150.60               | C3-60.45 to 60.43               | C3-145.73 to 145.73     | C3-60.45 to 60.45                      | C3-138.19 to 138.23     |
| C4;C5-106.28 to 106.47 & 106.96 | C4-106.89 to 107.91     | C4;C5-106.28 to 106.28          | C4-158.35;158.55 to 158.31;158.56 | C4;C5-106.28 to 106.27          |                         | C4;C5-106.28 to 106.28                 | C4-151.97 to 152.00     |
| C6-136.18 to 134.63             | C5-143.67 to 143.67     | C6-136.18 to 136.18             |                                   | C6-136.18 to 136.18             |                         | C6-136.18 to 136.18                    | C5-165.41 to 165.45     |
| C7-136.38 to 136.43             | C6-148.40 to 148.17     | C7-136.38 to 136.36             |                                   | C7-136.38 to 136.34             |                         | C7-136.38 to 136.37                    |                         |
| C8-153.16 to 153.26 & 145.79    | C7-151.51 to 151.52     | C8-153.16 to 153.16             |                                   | C8-153.16 to 153.16             |                         | C8-153.16 to 153.16                    |                         |
| C9-156.17 to 158.04             | C8-154.93 to 154.92     | C9-156.17 to 156.09             |                                   | C9-156.17 to 156.09             |                         | C9-156.17 to 156.14                    |                         |
| C10;C11-162.66;162.70 to 163.83 | C9-169.48 to 171.24     | C10;C11-162.66;162.70 to 162.67 |                                   | C10;C11-162.66;162.70 to 162.67 |                         | C10;C11-162.66;162.70 to 162.68;162.71 |                         |

**Table S3:**The % cumulative drug release in 0.1N HCl media at specified intervals of time.

| TIME INTERVAL (MINUTES) | % CUMULATIVE DRUG RELEASE OF TMP-API | % CUMULATIVE DRUG RELEASE OF TMP-THY-H2O | % CUMULATIVE DRUG RELEASE OF TMP-5FU |
|-------------------------|--------------------------------------|------------------------------------------|--------------------------------------|
| 0                       | 0                                    | 0                                        | 0                                    |
| 5                       | 67.7                                 | 72.2                                     | 93.7                                 |
| 10                      | 76.4                                 | 87.6                                     | 95.2                                 |
| 15                      | 77.9                                 | 87.8                                     | 95.6                                 |
| 30                      | 78.2                                 | 87.9                                     | 97.1                                 |
| 45                      | 78.7                                 | 88.5                                     | 97.7                                 |



|   |   |       |                  |       |       |     |       |       |
|---|---|-------|------------------|-------|-------|-----|-------|-------|
| 1 | - | 10.61 | B3LYP/6-31G(d,p) | -79.6 | -16.1 | -14 | 122.7 | -32.5 |
|---|---|-------|------------------|-------|-------|-----|-------|-------|

**Table S6:** Interaction energies of heterosynthons and homosynthons present in TMP-5FU. R is the distance between molecular centroids (mean atomic position) in Å

| N | Symp | R    | Electron Density | E_ele | E_pol | E_dis | E_rep | E_tot |
|---|------|------|------------------|-------|-------|-------|-------|-------|
| 1 | -    | 9.03 | B3LYP/6-31G(d,p) | -81.4 | -17.8 | -16.6 | 134.1 | -30.9 |

**Table S7:** Interaction energies of homosynthons present in TMP-CAT. R is the distance between molecular centroids (mean atomic position) in Å

| N | Symp | R    | Electron Density | E_ele | E_pol | E_dis | E_rep | E_tot |
|---|------|------|------------------|-------|-------|-------|-------|-------|
| 1 | -    | 6.99 | B3LYP/6-31G(d,p) | -82.8 | -21.7 | -17.8 | 102.8 | -55.6 |
| 1 | -    | 9.79 | B3LYP/6-31G(d,p) | -18   | -3.3  | -8.2  | 18.7  | -17.1 |

**Table S8:** Interaction energies of heterosynthons present in TMP A-THY B. R is the distance between molecular centroids (mean atomic position) in Å

| N | Symp | R    | Electron Density | E_ele  | E_pol | E_dis | E_rep | E_tot |
|---|------|------|------------------|--------|-------|-------|-------|-------|
| 1 | -    | 7.31 | B3LYP/6-31G(d,p) | -107.1 | -22.4 | -22.1 | 114.9 | -78.1 |
| 1 | -    | 8.69 | B3LYP/6-31G(d,p) | -102   | -6.2  | -17.4 | 114.8 | -56.7 |

**Table S9:** Interaction energies of heterosynthons present in TMP B-THY A. R is the distance between molecular centroids (mean atomic position) in Å.

| N | Symop | R    | Electron Density | E_ele  | E_pol | E_dis | E_rep | E_tot |
|---|-------|------|------------------|--------|-------|-------|-------|-------|
| 1 | -     | 7.38 | B3LYP/6-31G(d,p) | -109.9 | -23.1 | -22.4 | 120.5 | -78.3 |
| 1 | -     | 8.07 | B3LYP/6-31G(d,p) | -102.5 | -0.1  | -17.5 | 112.8 | -54   |

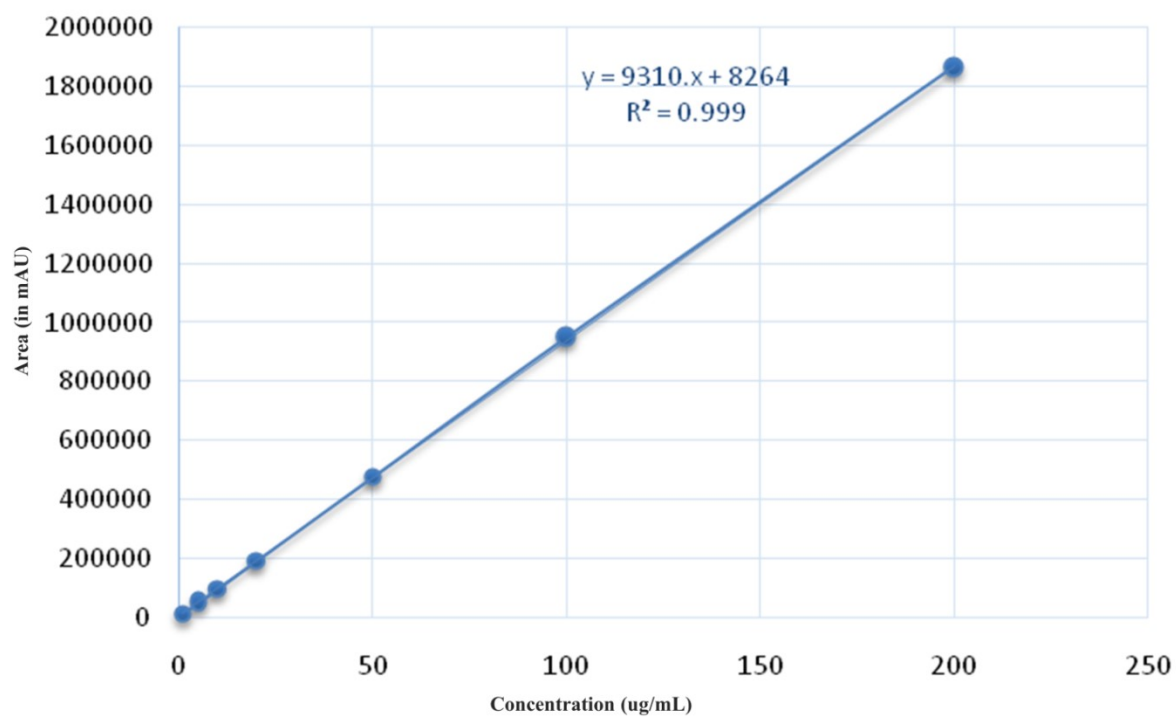

**Fig.S1**The linearity curve of TMP using HPLC for solubility studies

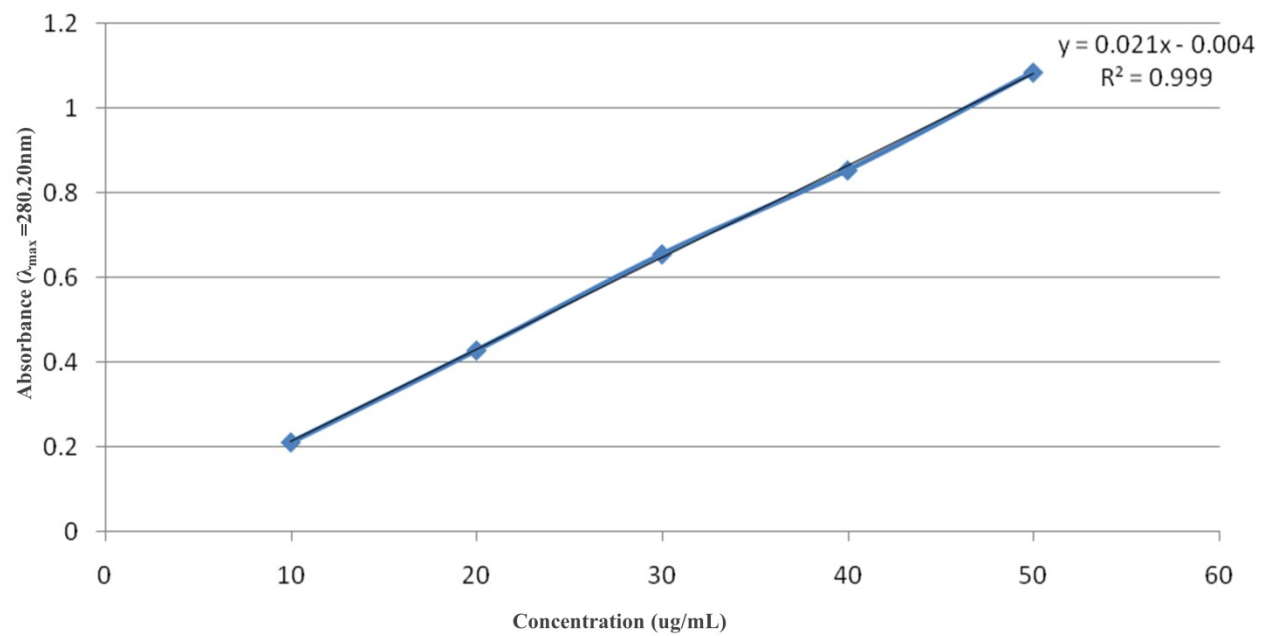

**Fig.S2**The linearity curve of TMP (in water) using UV-Visible spectroscopy for dissolution studies.

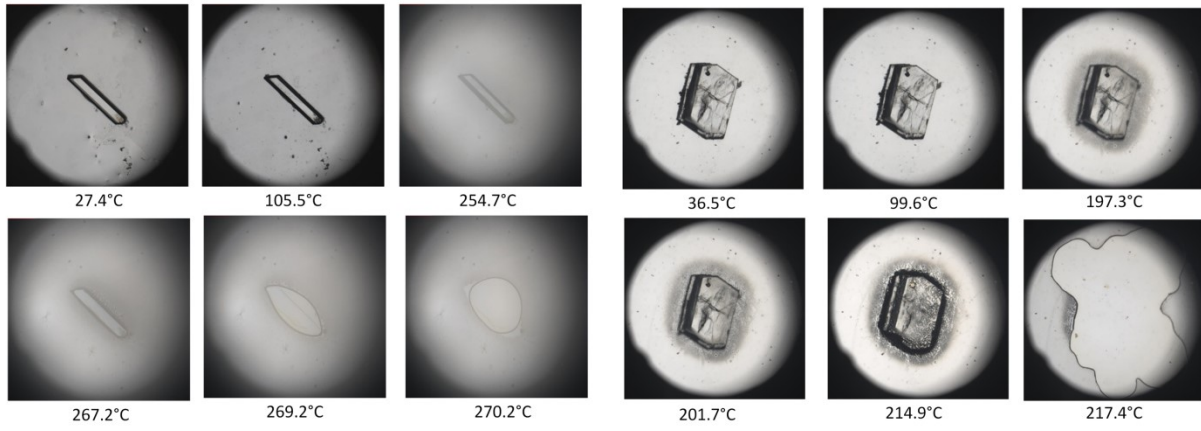

**HSM OF TMP-T7A**

**HSM OF TMP-5FU**

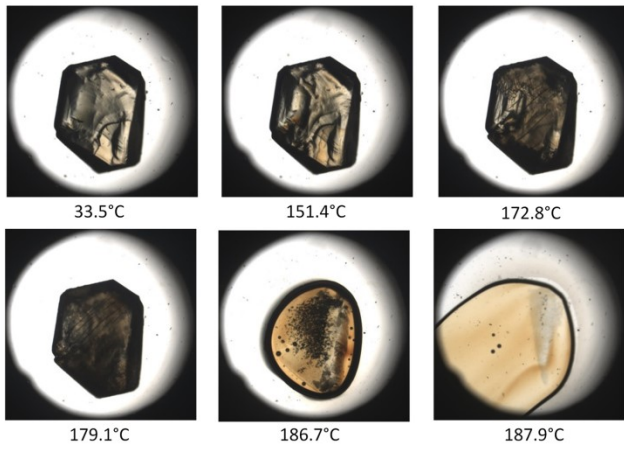

**HSM OF TMP-CAT**

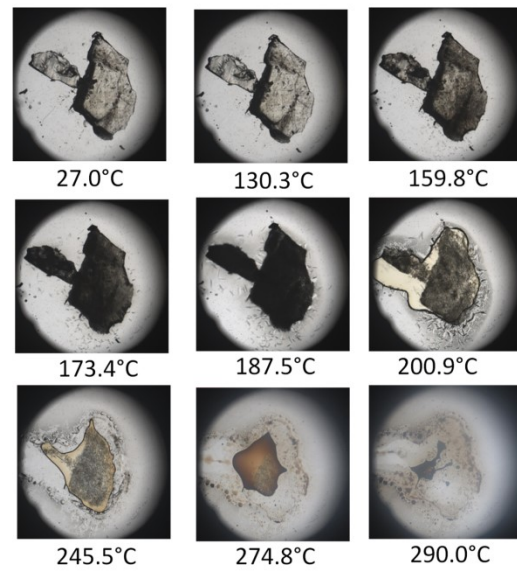

**HSM OF TMP-THY-H2O**

**Fig.S3**HSM of TMP-T7A, TMP-5FU, TMP-CAT and TMP-THY-H<sub>2</sub>O

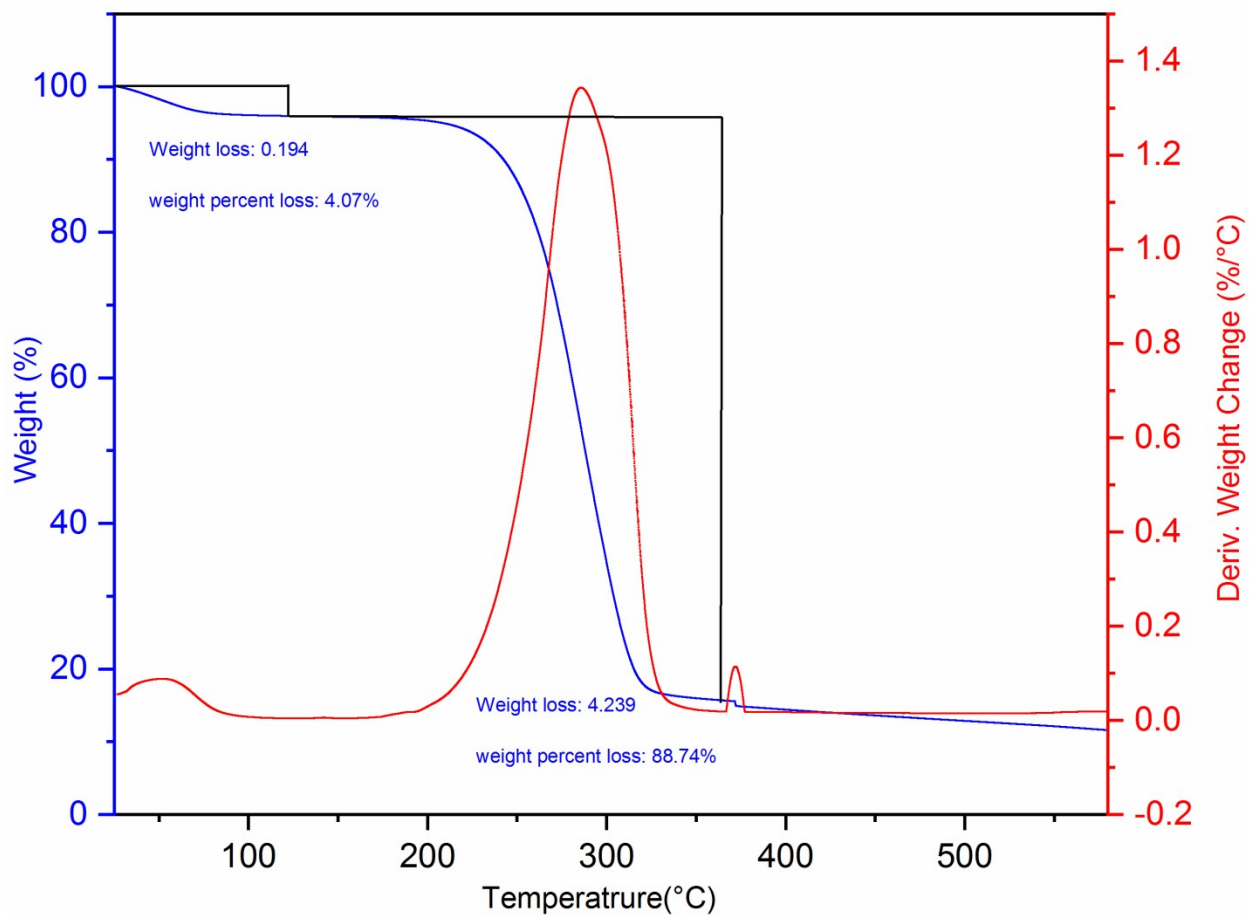

Fig.S4 The TGA plot of TMP-THY-H2O



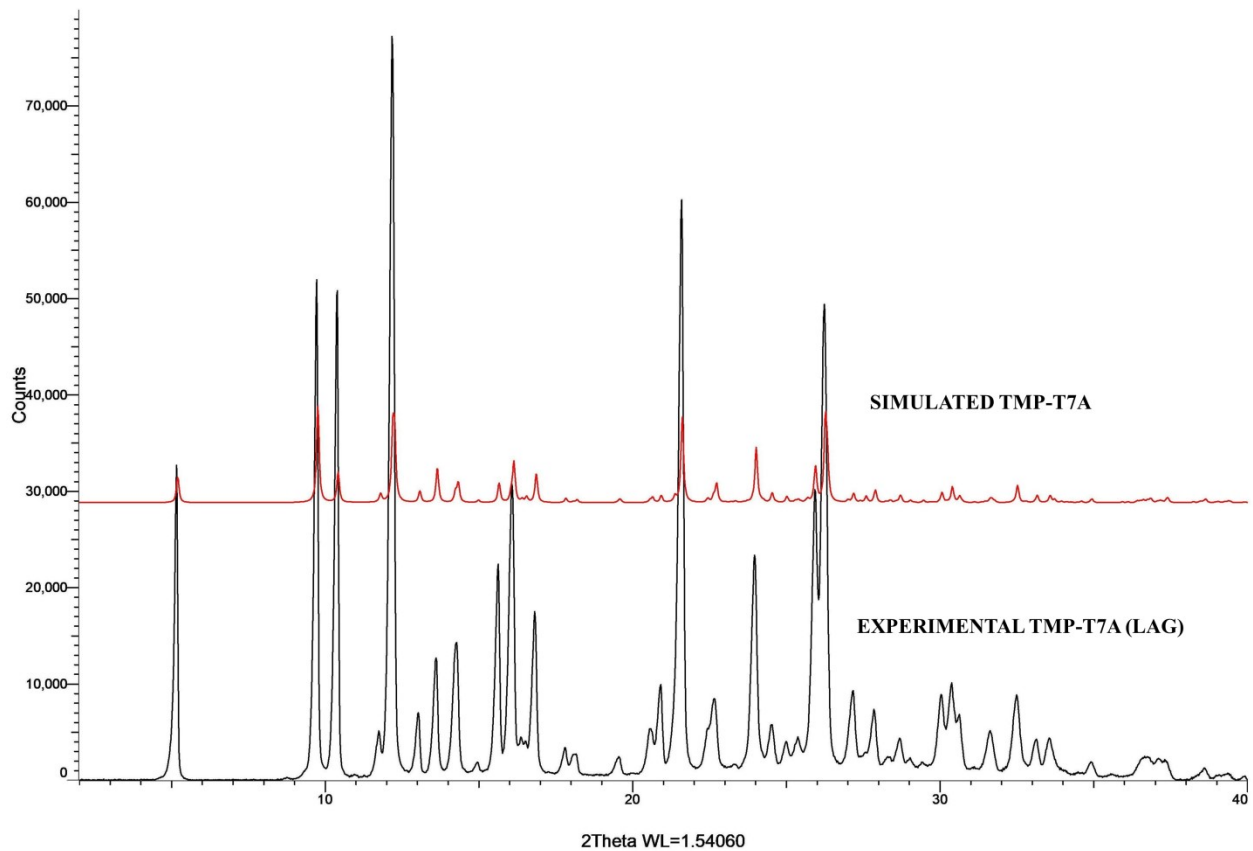

Fig.S5PXRD overlay of liquid assisted ground powder of TMP-T7A with its simulated pattern.

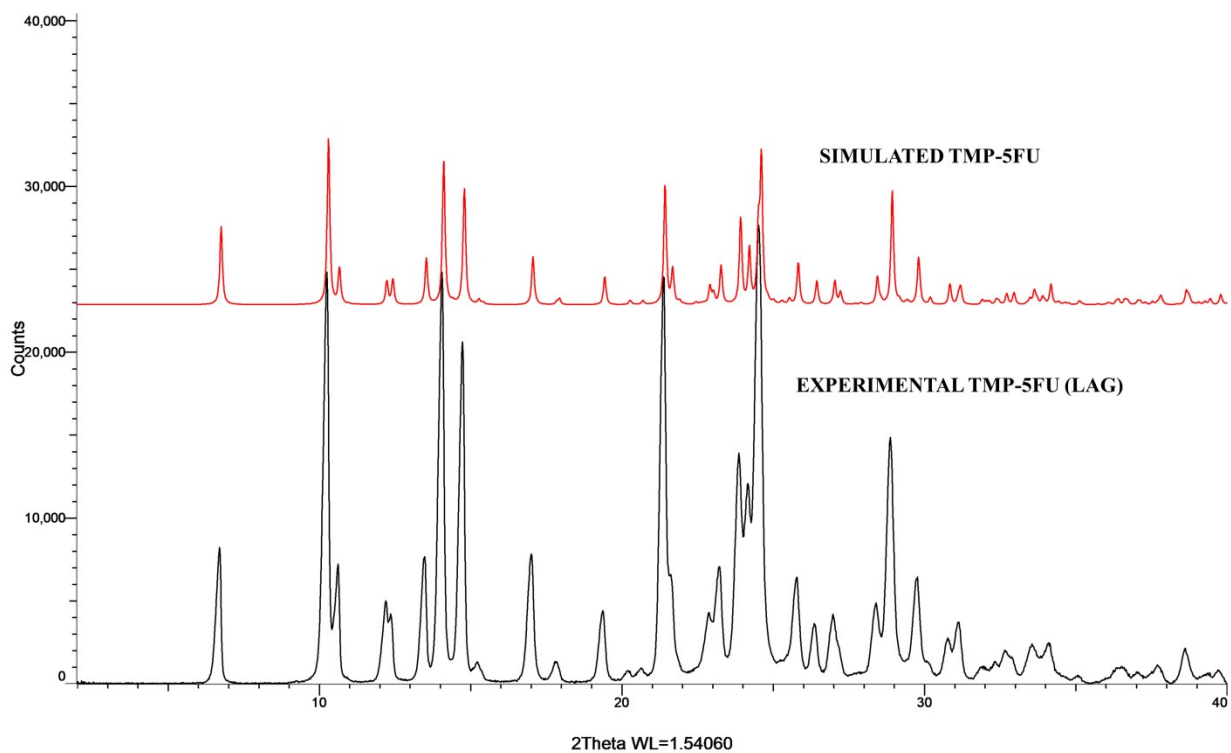

Fig.S6PXRD overlay of liquid assisted ground powder of TMP-5FU with its simulated pattern.

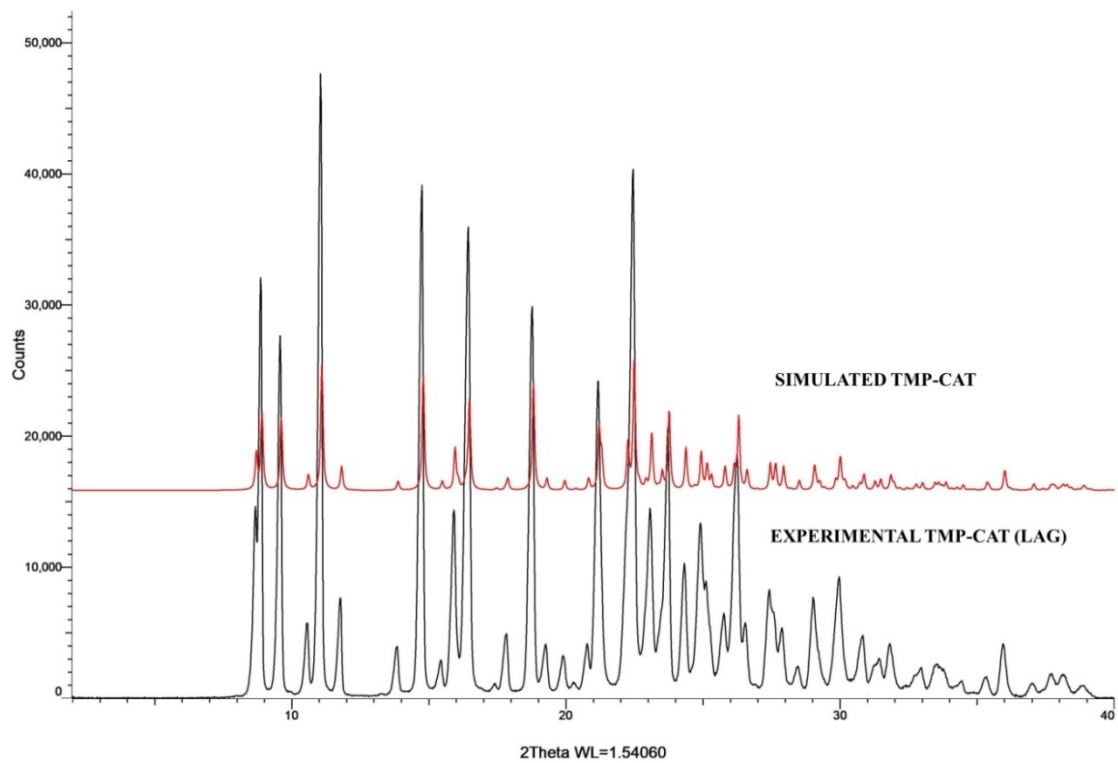

**Fig.S7** XRD overlay of liquid assisted ground powder of TMP-CAT with its simulated pattern.

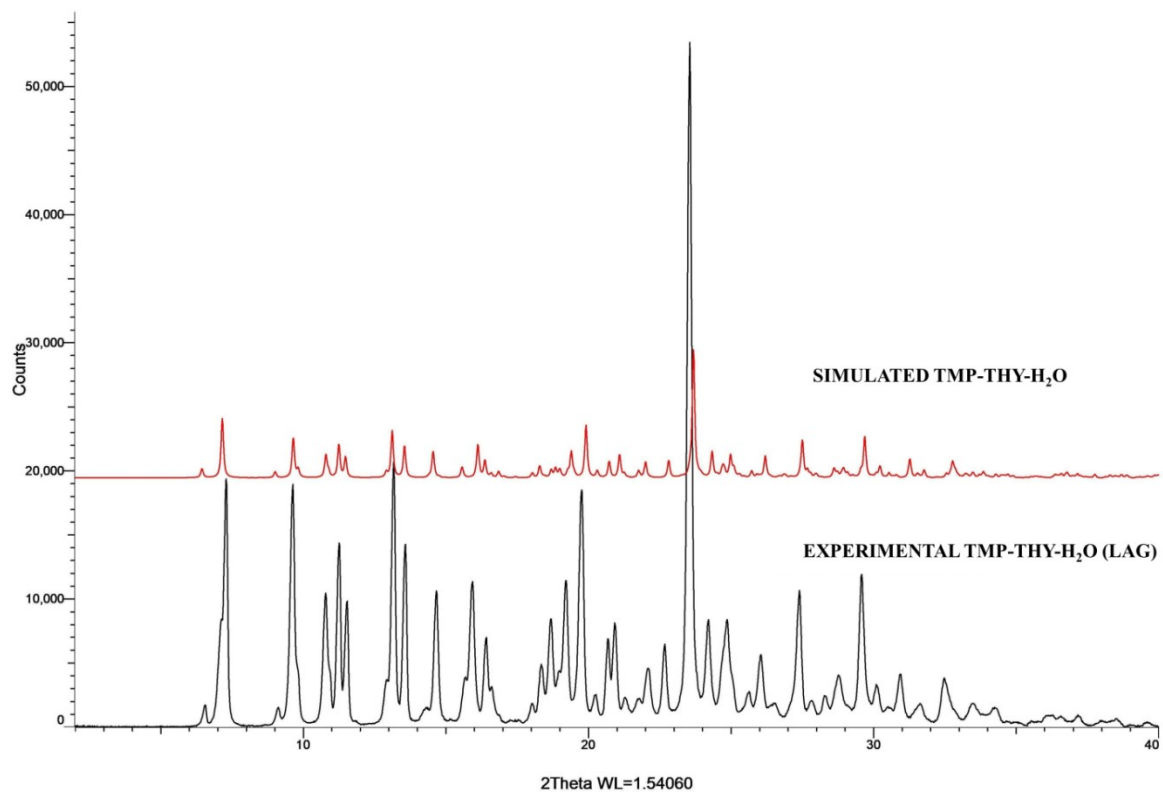

**Fig.S8** XRD overlay of liquid assisted ground powder of TMP-THY-H<sub>2</sub>O with its simulated pattern.

$^1\text{H}$  NMR of TMP ( $\text{C}_{14}\text{H}_{18}\text{N}_4\text{O}_3$ )

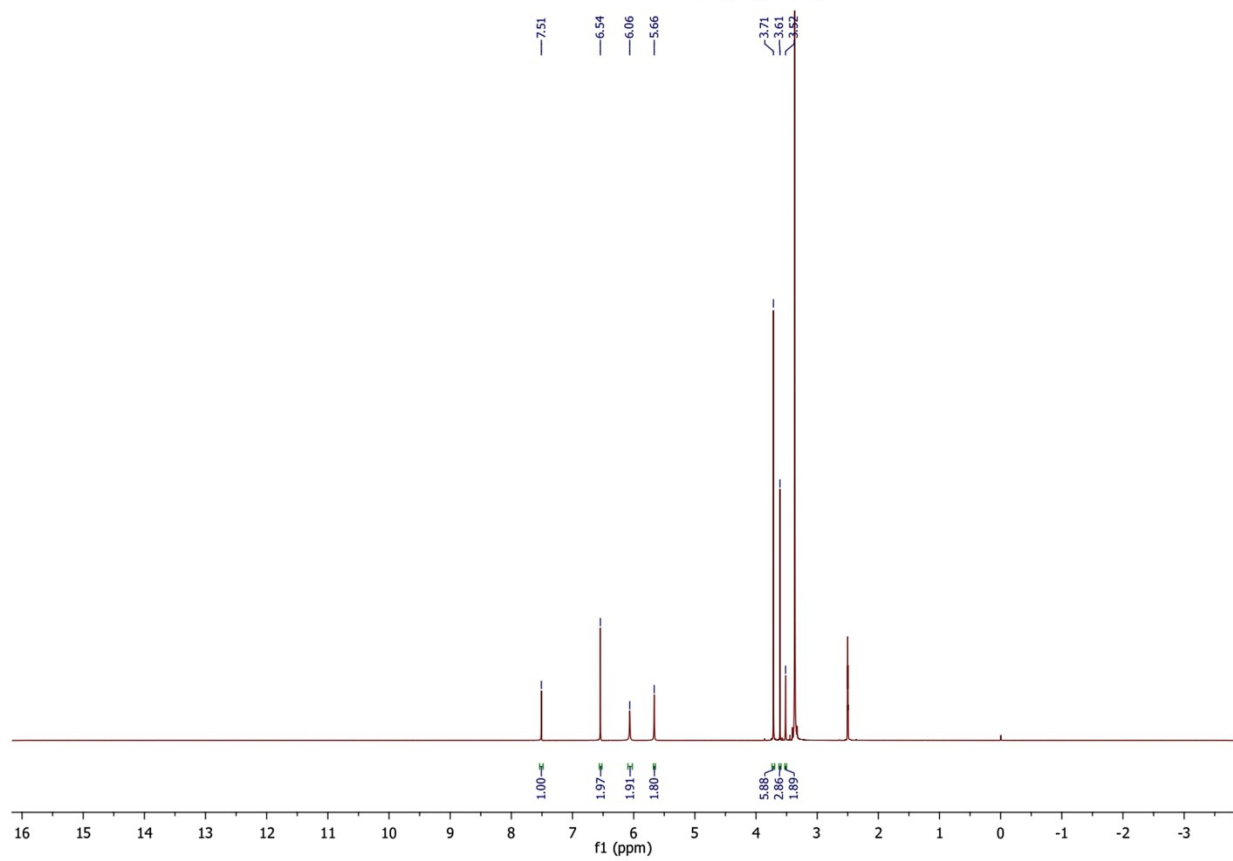

Fig.S9  $^1\text{H}$  NMR of TMP.

<sup>1</sup>H NMR of T7A (C<sub>9</sub>H<sub>10</sub>N<sub>4</sub>O<sub>4</sub>)

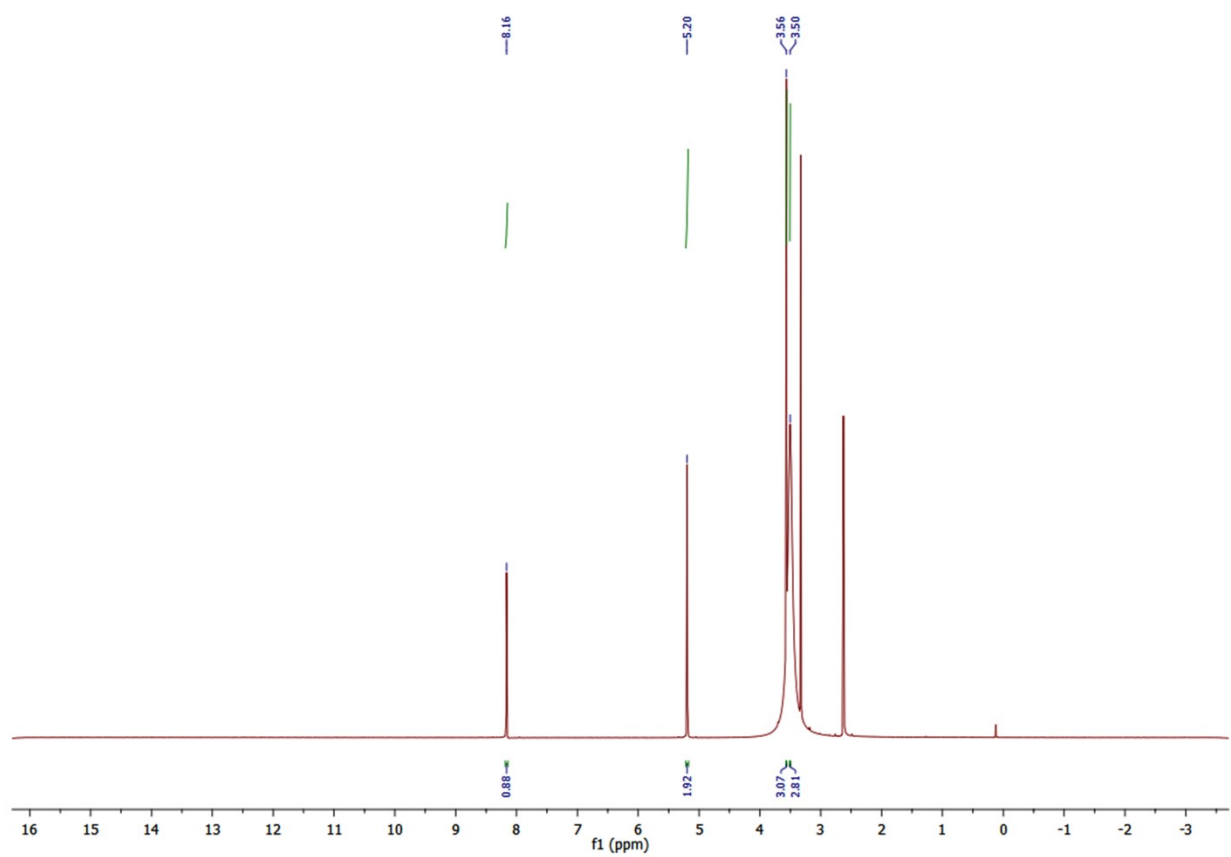

Fig.S10 <sup>1</sup>H NMR of T7A.

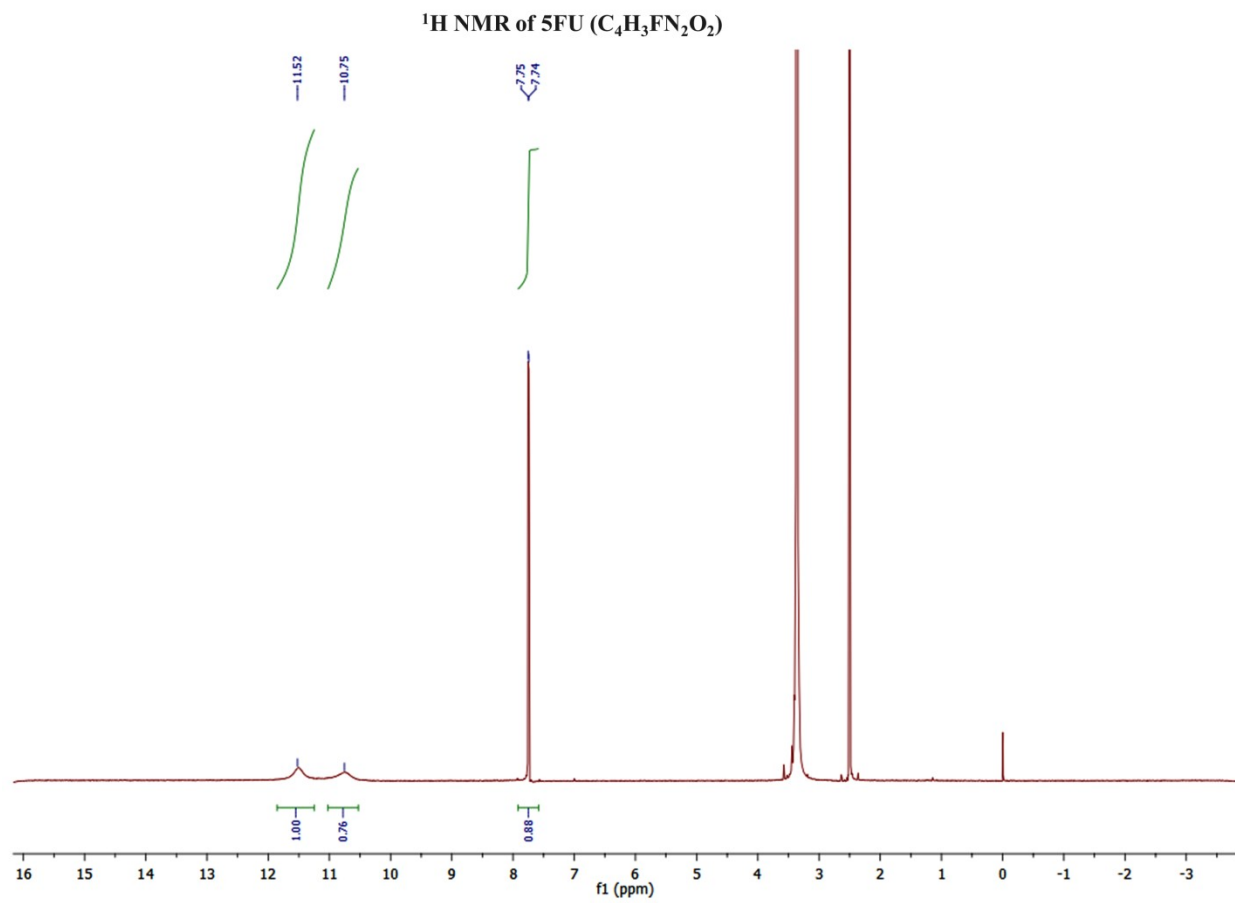

**Fig.S11** <sup>1</sup>H NMR of 5FU.

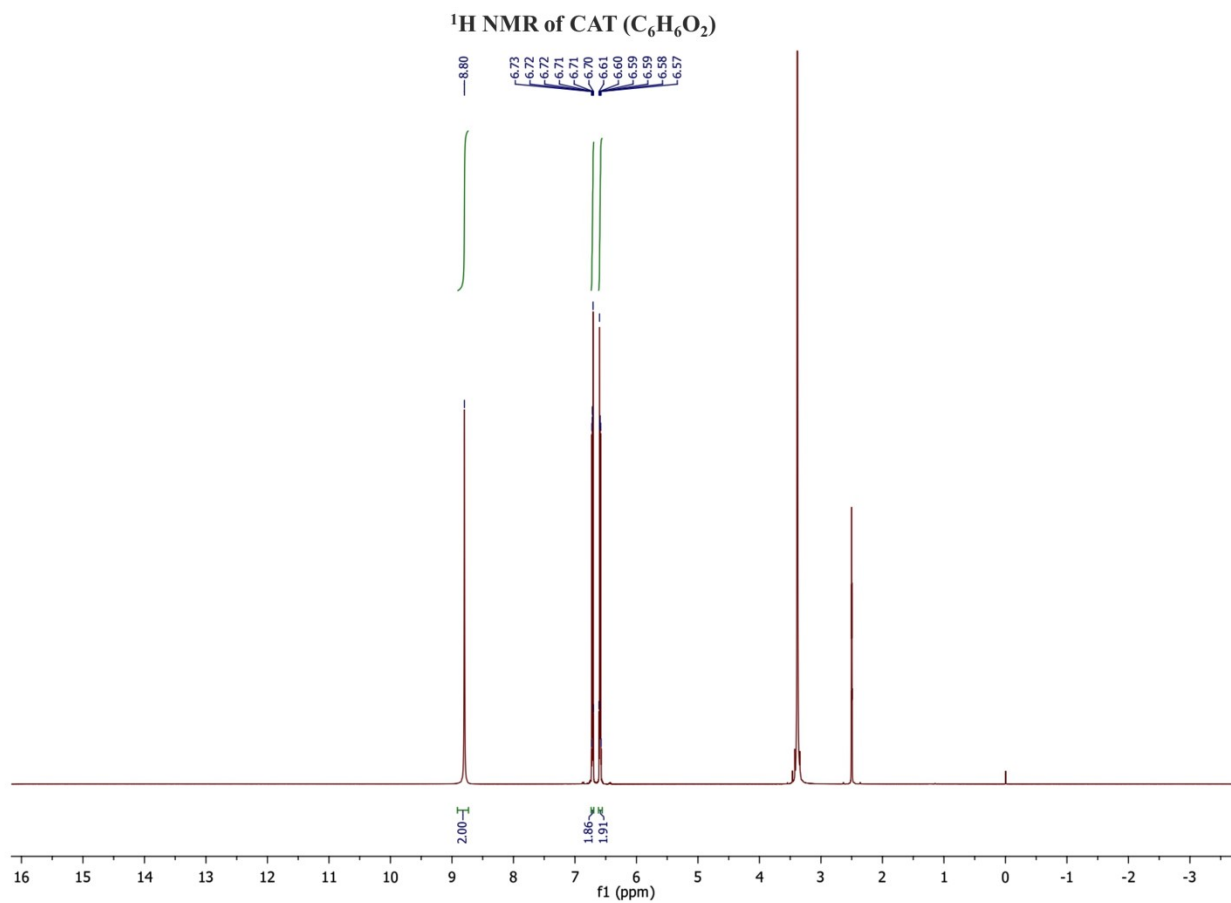

**Fig.S12**  $^1\text{H}$  NMR of CAT.

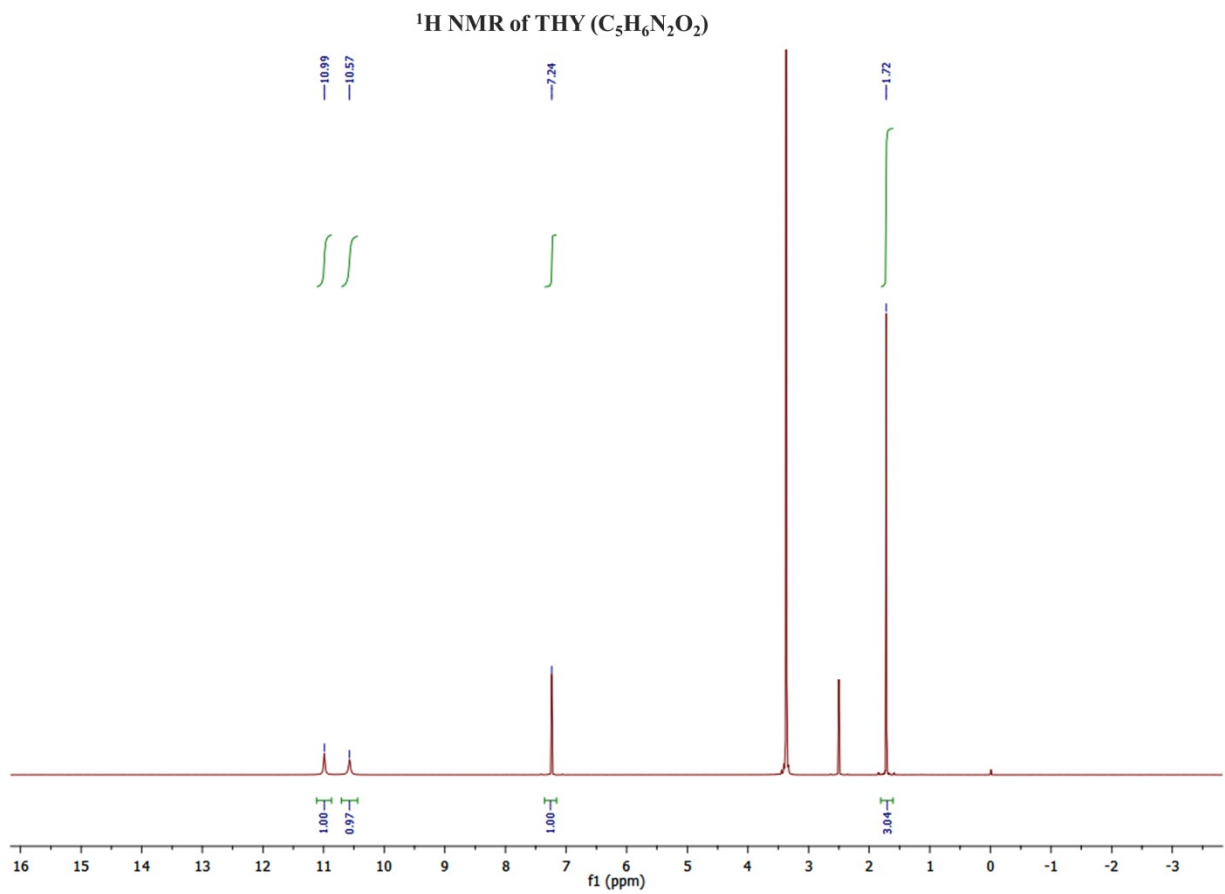

**Fig.S13** <sup>1</sup>H NMR of THY.

<sup>1</sup>H NMR of TMP-T7A (C<sub>14</sub>H<sub>19</sub>N<sub>4</sub>O<sub>3</sub><sup>+</sup> C<sub>9</sub>H<sub>9</sub>N<sub>4</sub>O<sub>4</sub><sup>-</sup>)

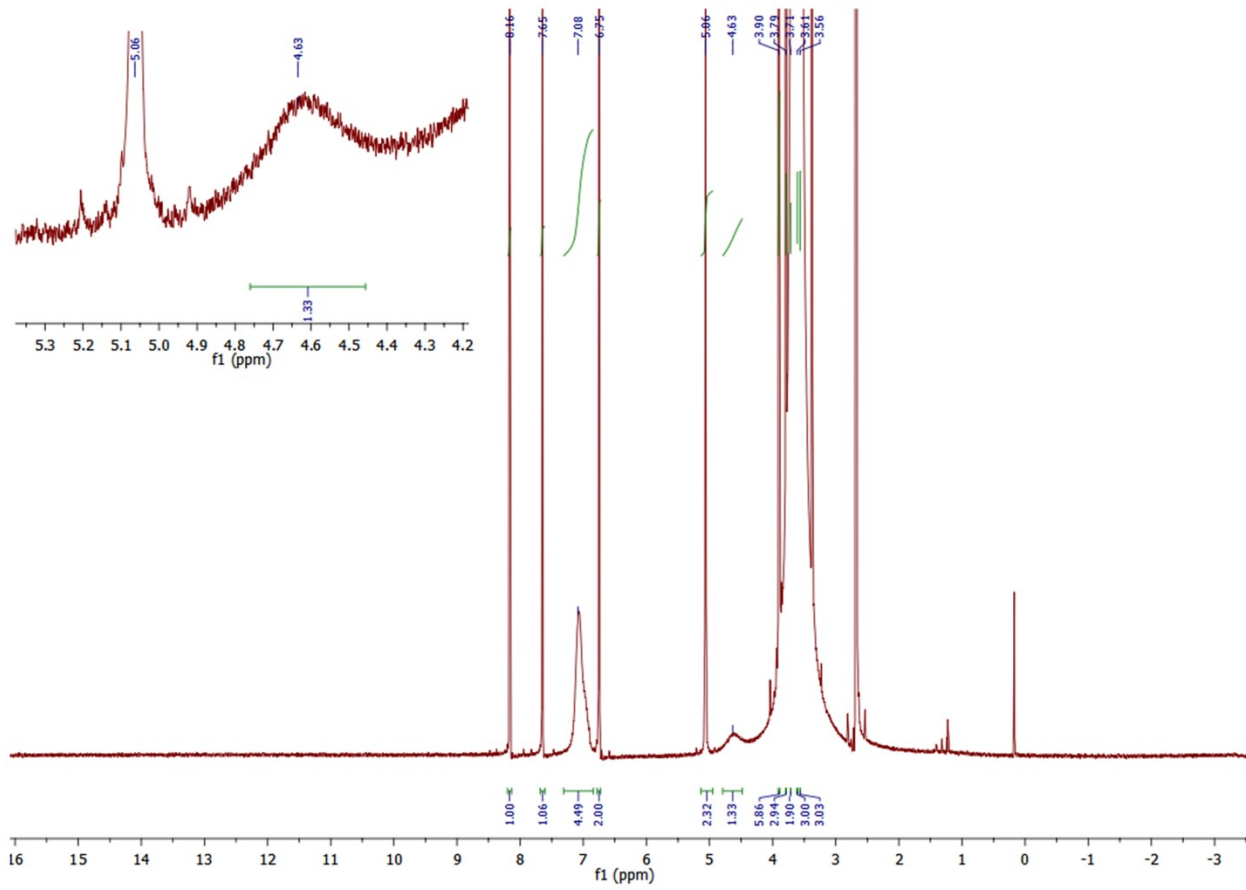

Fig.S14 <sup>1</sup>H NMR of TMP-T7A.



$^1\text{H}$  NMR of TMP-5FU ( $\text{C}_{14}\text{H}_{19}\text{N}_4\text{O}_3^+ \text{C}_4\text{H}_2\text{FN}_2\text{O}_2^-$ )

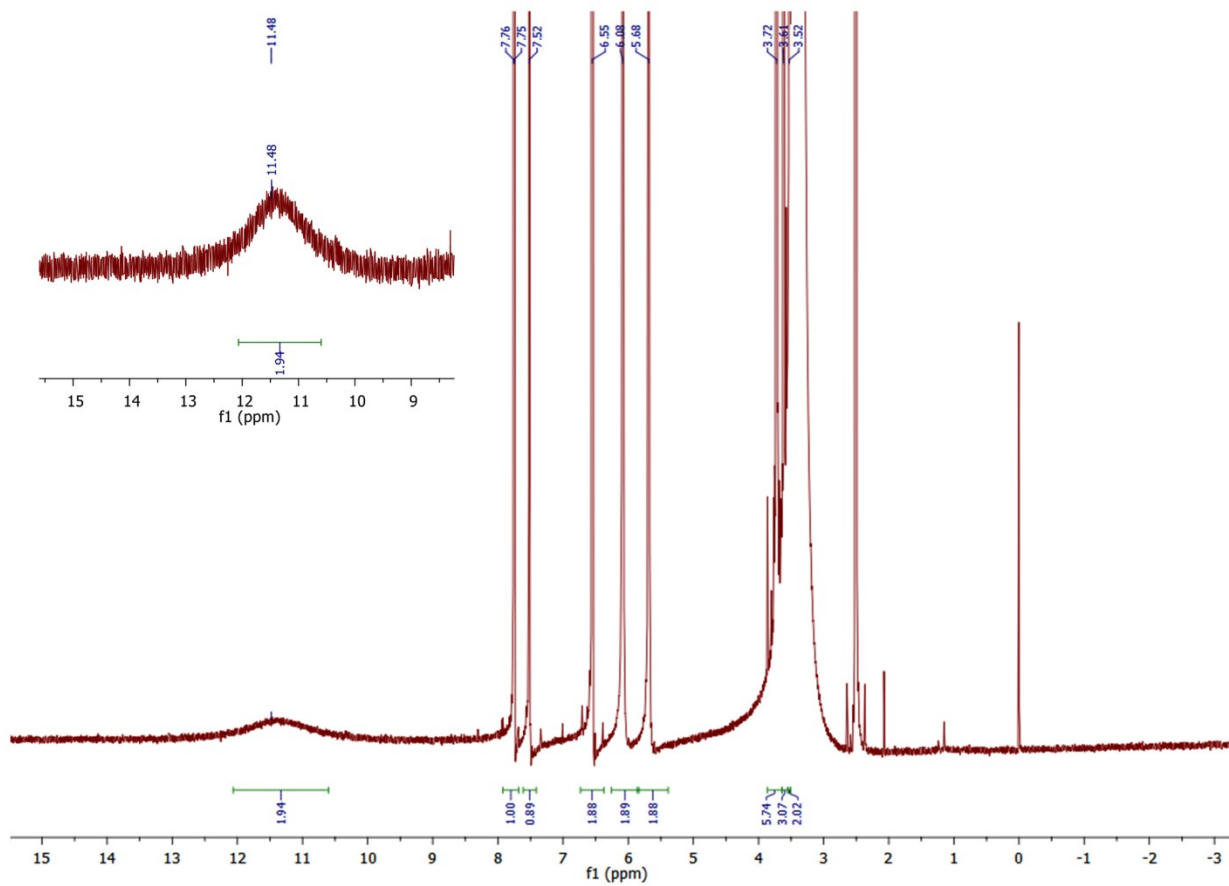

Fig.S15  $^1\text{H}$  NMR of TMP-5FU.

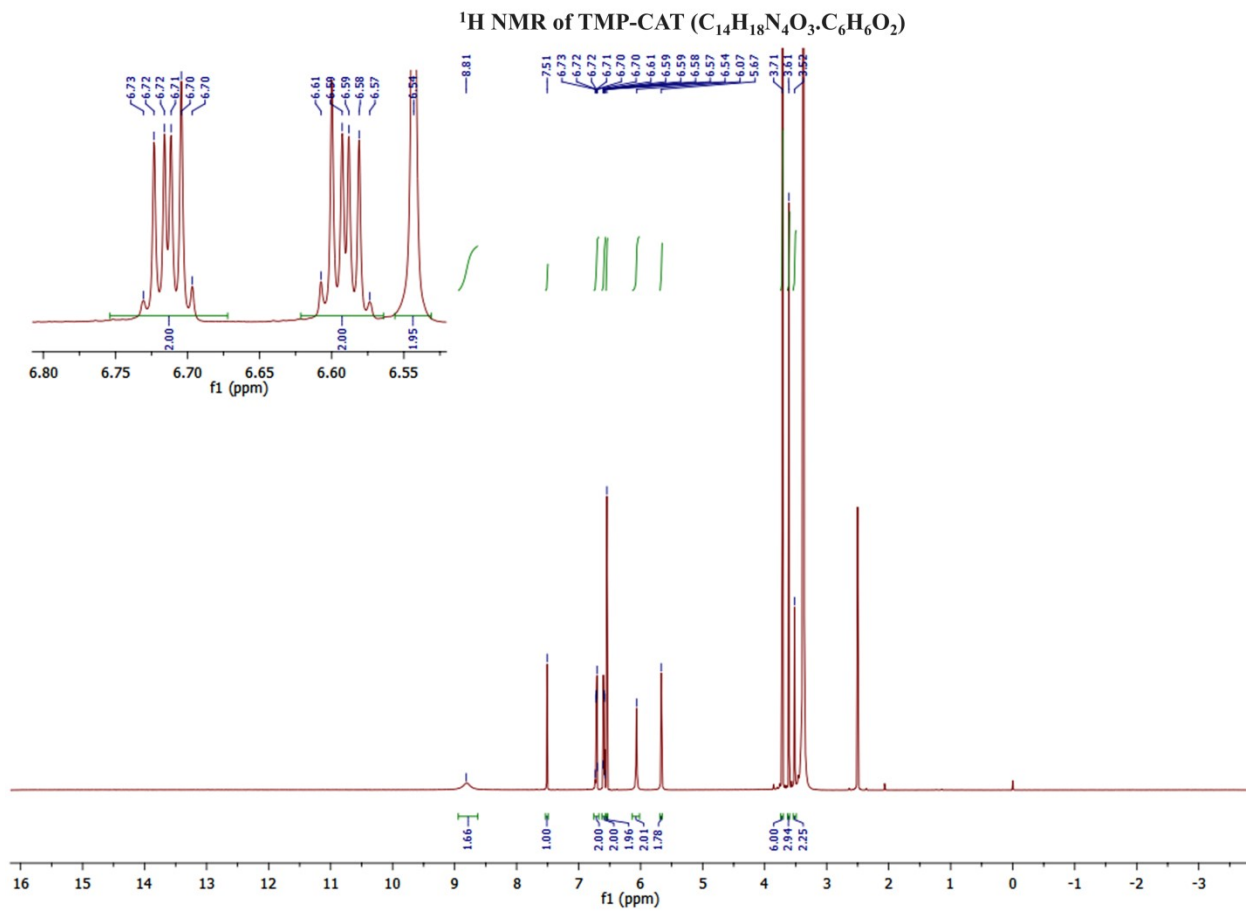

**Fig.S16**  $^1\text{H}$  NMR of TMP-CAT.

<sup>1</sup>H NMR of TMP-THY-H<sub>2</sub>O (C<sub>14</sub>H<sub>18</sub>N<sub>4</sub>O<sub>3</sub>·C<sub>5</sub>H<sub>6</sub>N<sub>2</sub>O<sub>2</sub>·H<sub>2</sub>O)

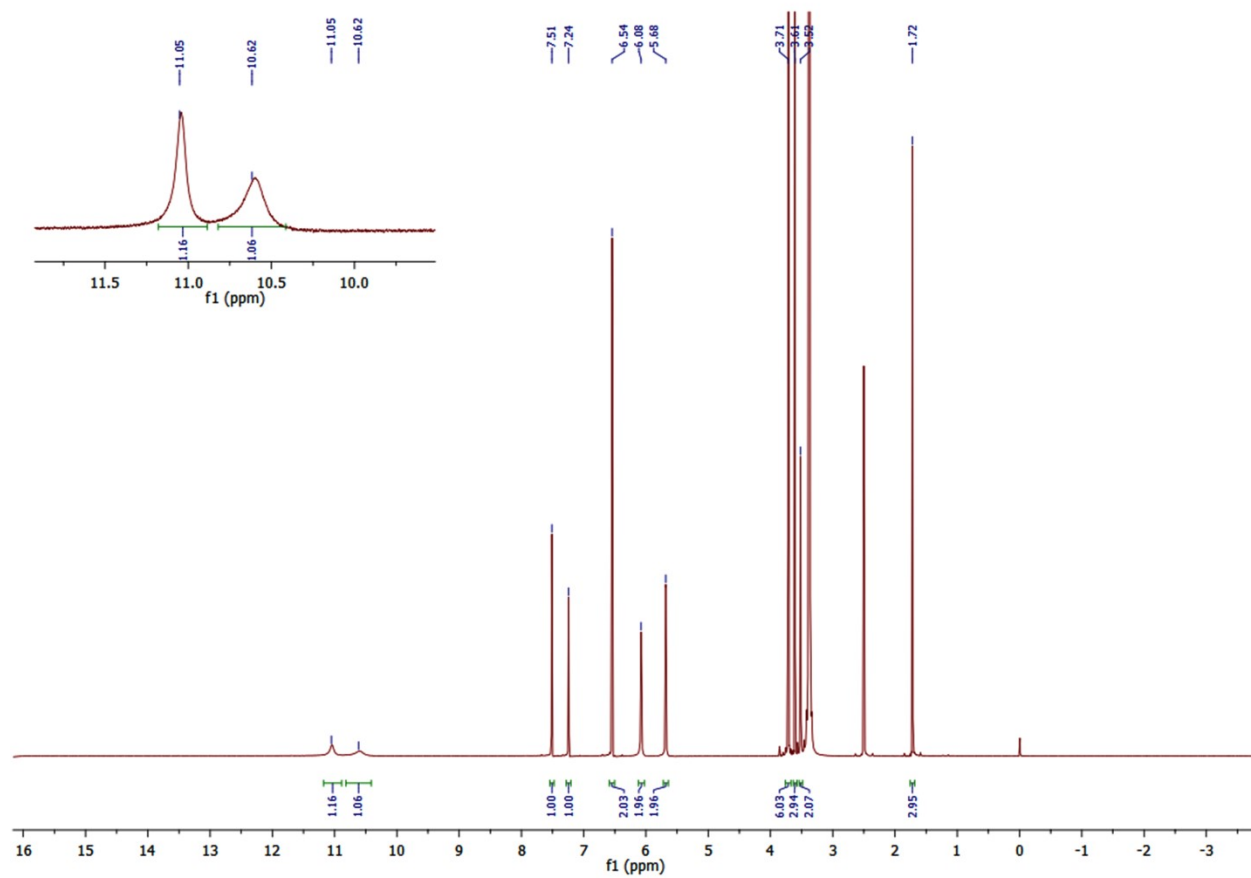

Fig.S17 <sup>1</sup>H NMR of TMP-THY-H<sub>2</sub>O.

<sup>13</sup>C NMR OVERLAY of TMP-T7A (C<sub>14</sub>H<sub>19</sub>N<sub>4</sub>O<sub>3</sub><sup>+</sup> C<sub>9</sub>H<sub>9</sub>N<sub>4</sub>O<sub>4</sub><sup>-</sup>)

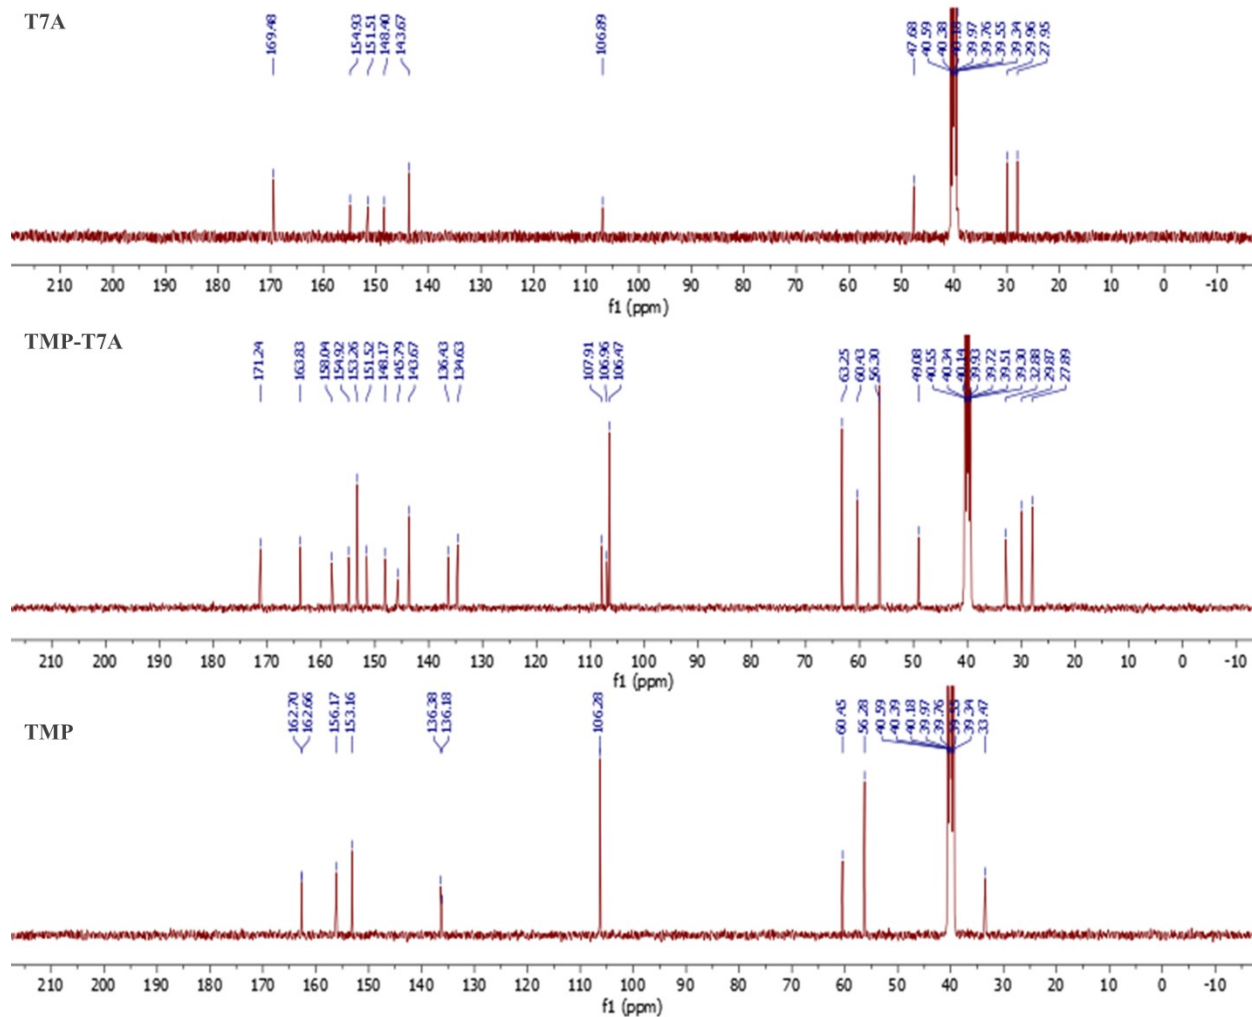

Fig.S18 <sup>13</sup>C NMR of TMP-T7A.

<sup>13</sup>C NMR OVERLAY of TMP-5FU (C<sub>14</sub>H<sub>19</sub>N<sub>4</sub>O<sub>3</sub><sup>+</sup> C<sub>4</sub>H<sub>2</sub>FN<sub>2</sub>O<sub>2</sub><sup>-</sup>)

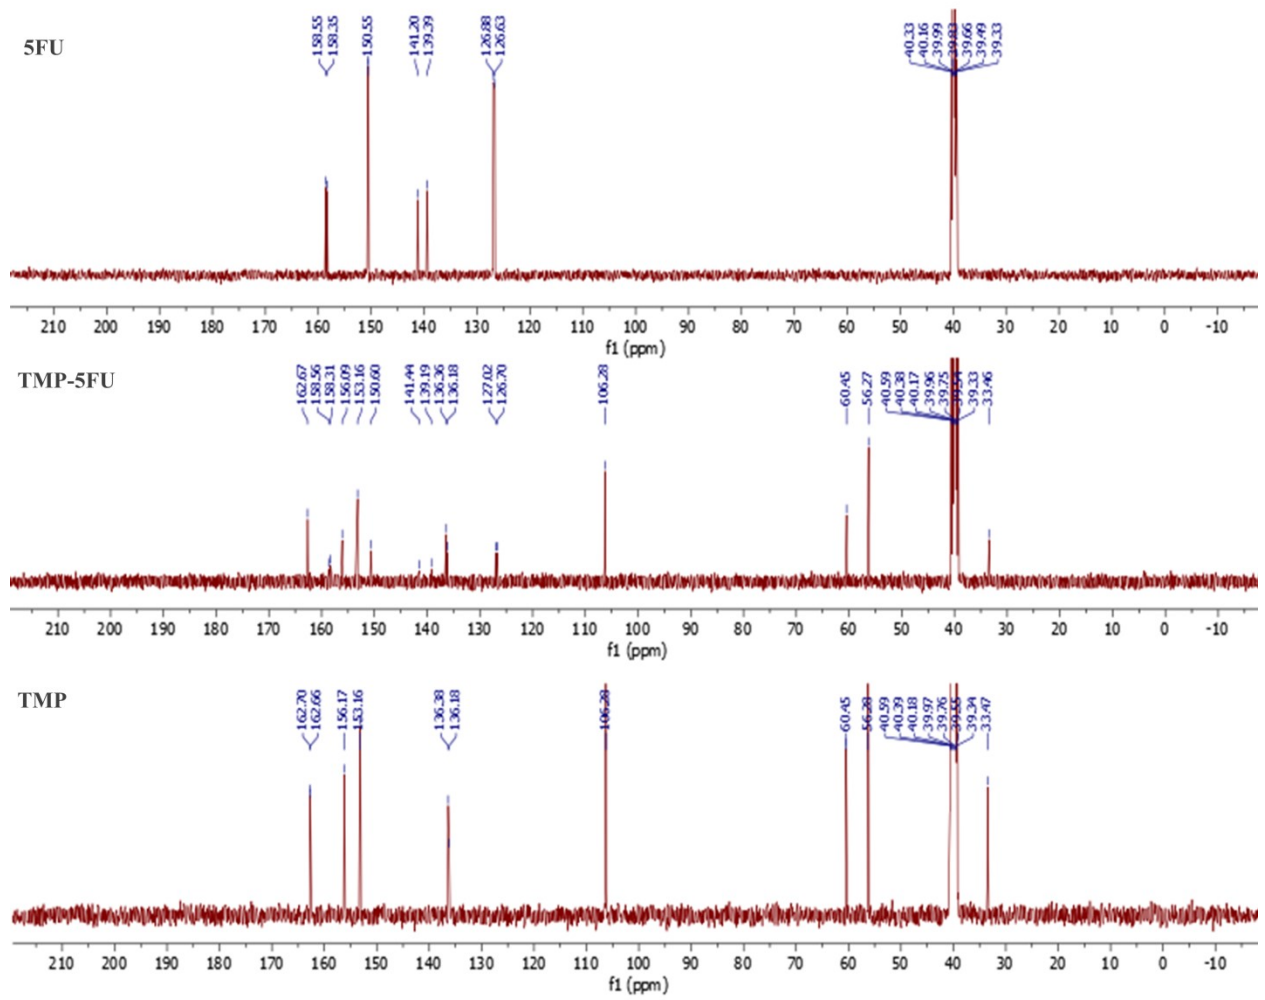

Fig.S19 <sup>13</sup>C NMR of TMP-5FU.

<sup>13</sup>C NMR OVERLAY of TMP-CAT (C<sub>14</sub>H<sub>18</sub>N<sub>4</sub>O<sub>3</sub>·C<sub>6</sub>H<sub>6</sub>O<sub>2</sub>)

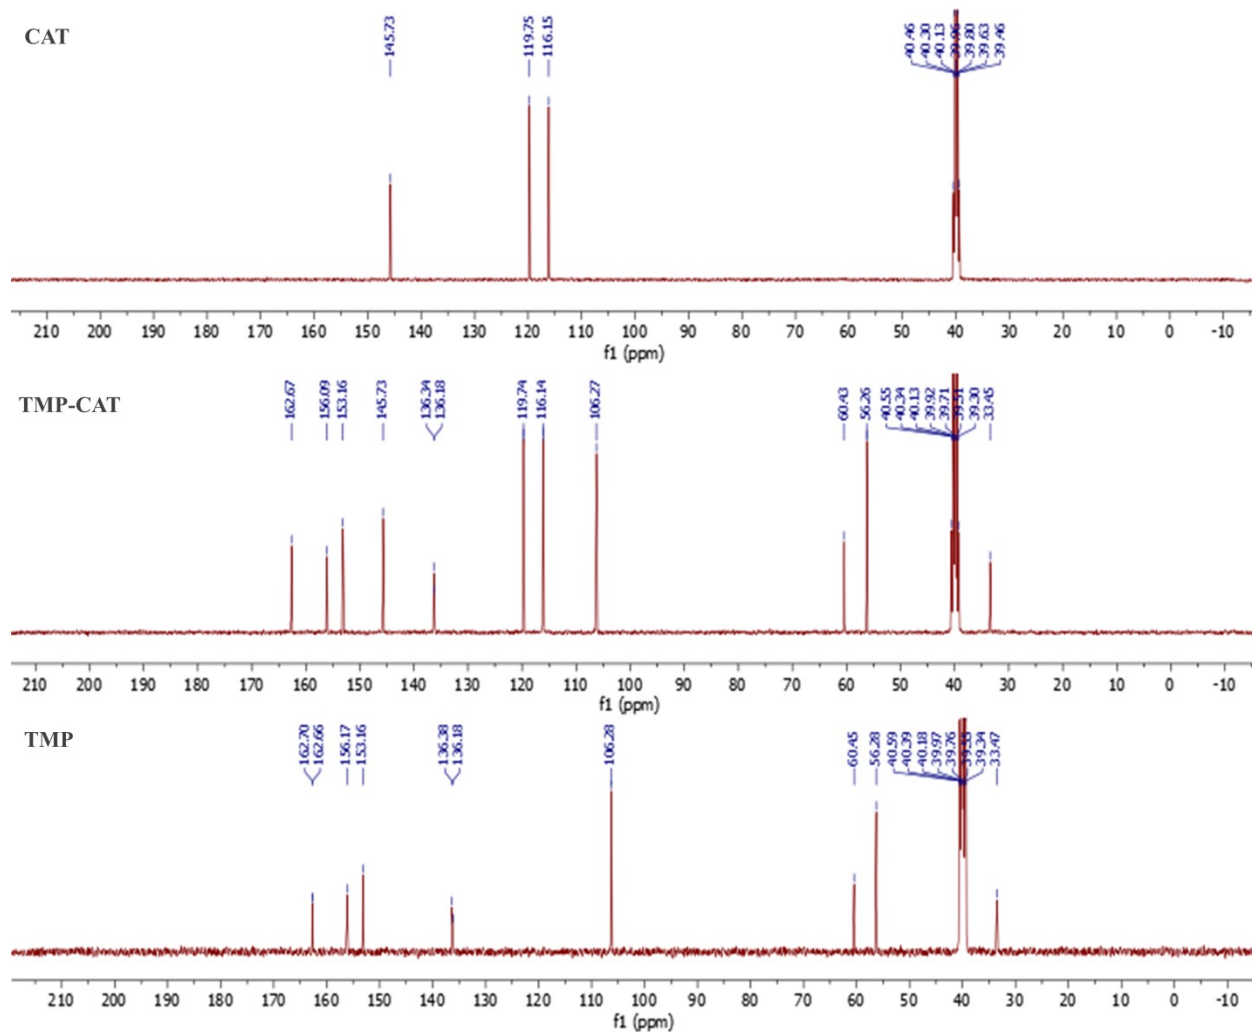

Fig.S20 <sup>13</sup>C NMR of TMP-CAT.

<sup>13</sup>C NMR of OVERLAY TMP-THY-H2O (C<sub>14</sub>H<sub>18</sub>N<sub>4</sub>O<sub>3</sub>·C<sub>5</sub>H<sub>6</sub>N<sub>2</sub>O<sub>2</sub>·H<sub>2</sub>O)

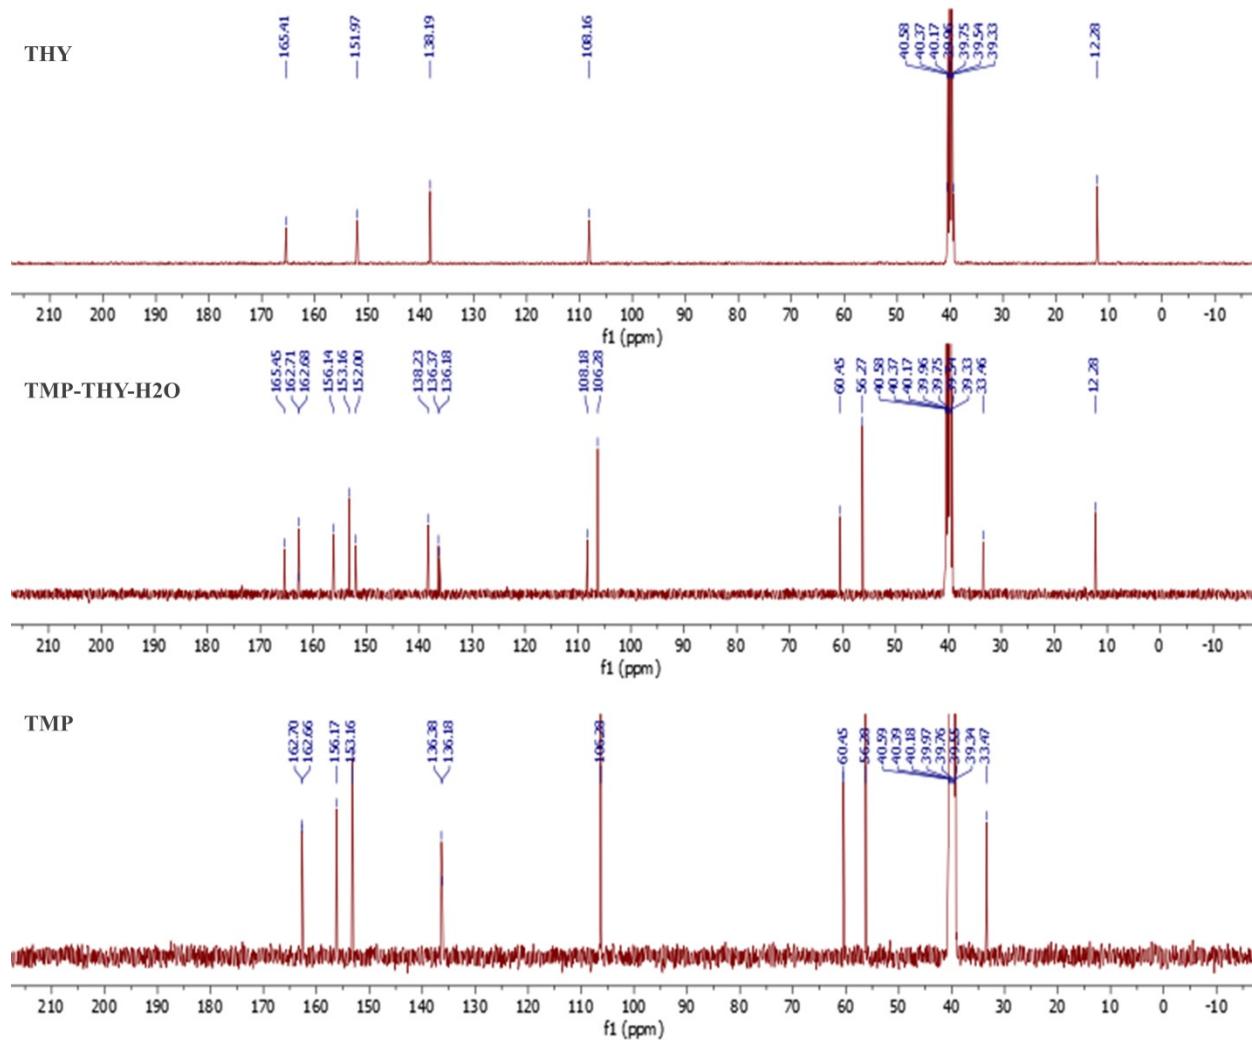

Fig.S21 <sup>13</sup>C NMR of TMP-THY-H2O.

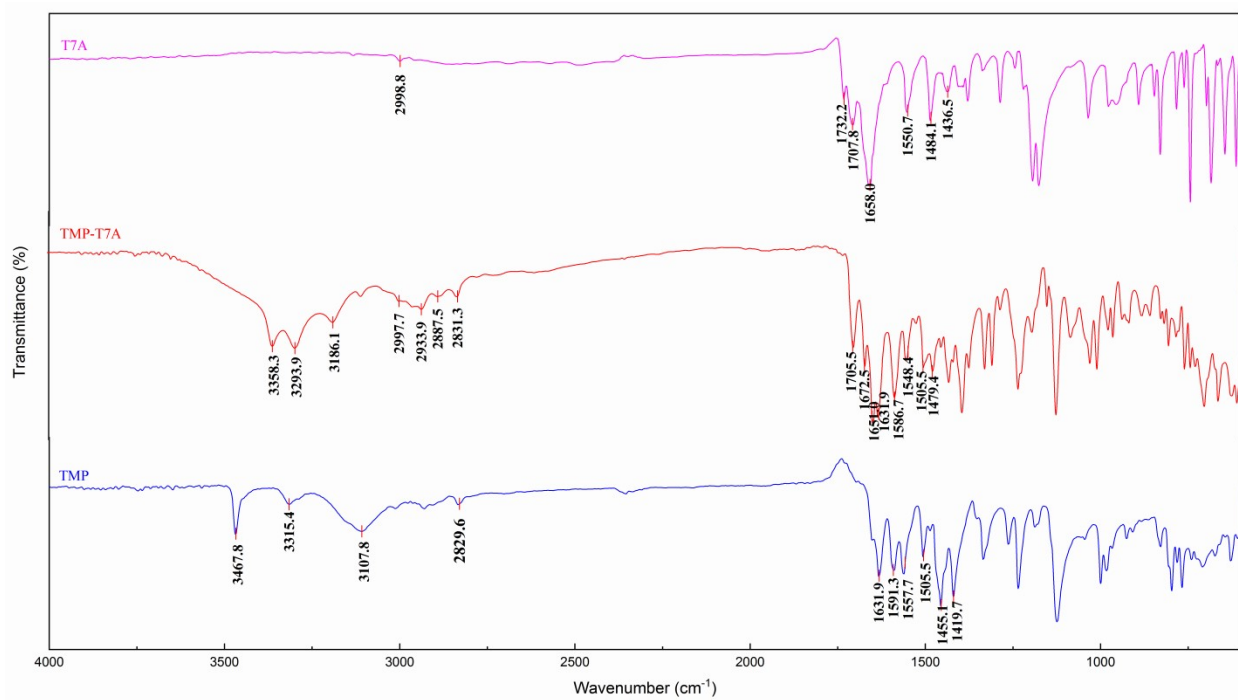

Fig.S22 Overlay of IR spectrum of TMP, TMP-T7A and T7A.

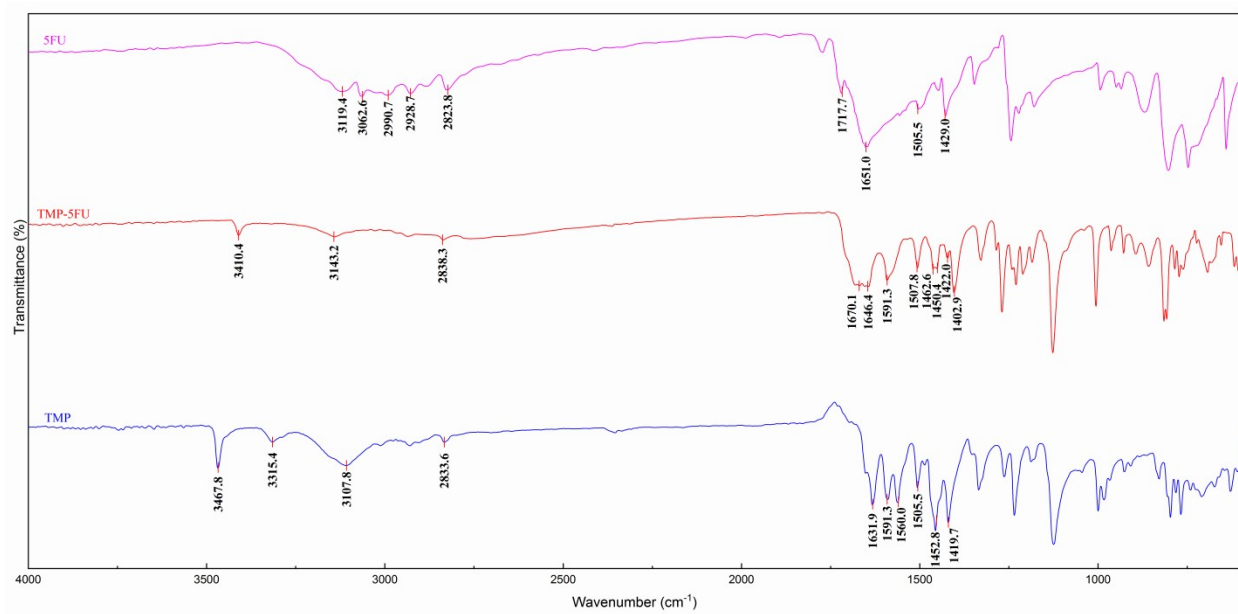

Fig.S23 Overlay of IR spectrum of TMP, TMP-5FU and 5FU.



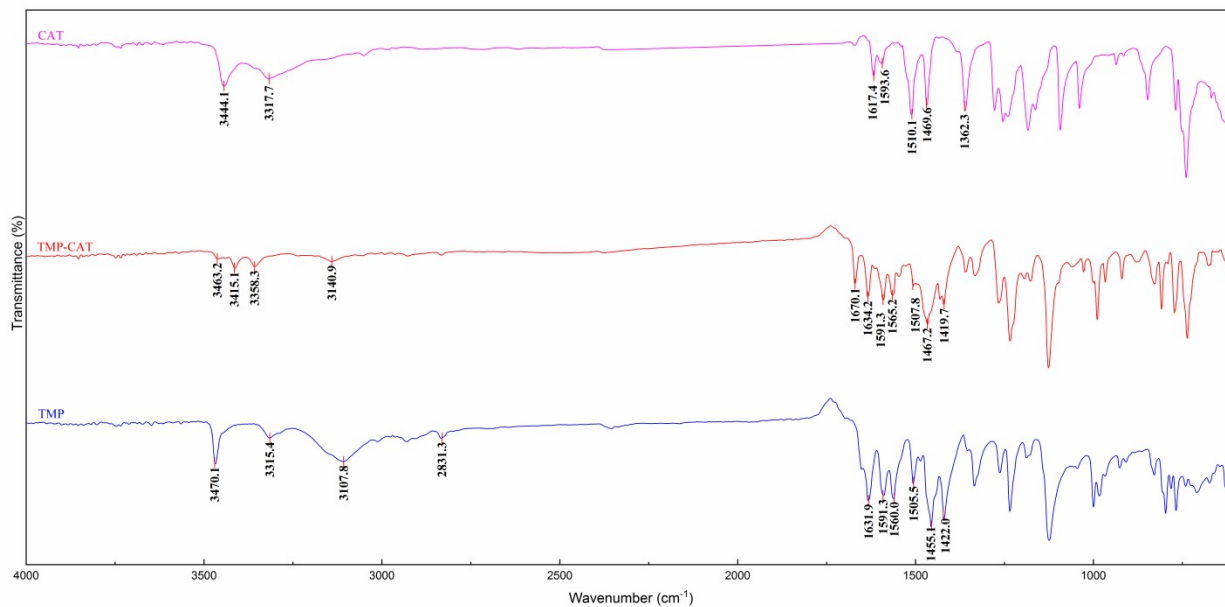

Fig.S24 Overlay of IR spectrum of TMP, TMP-CAT and CAT.

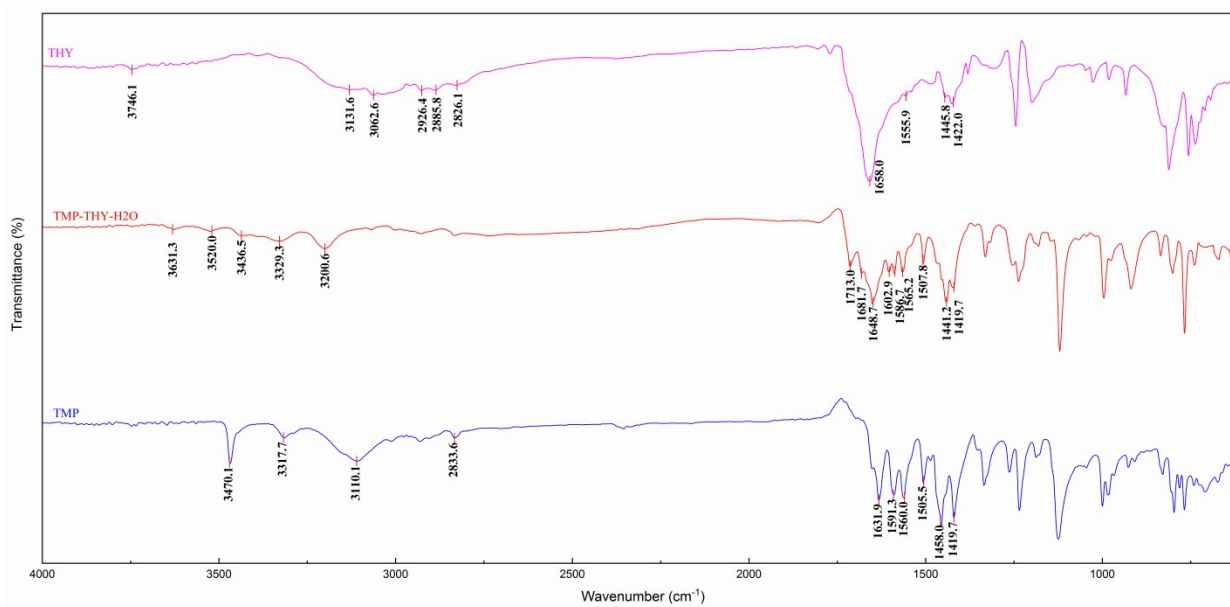

Fig.S25 Overlay of IR spectrum of TMP, TMP-THY-H2O and THY.

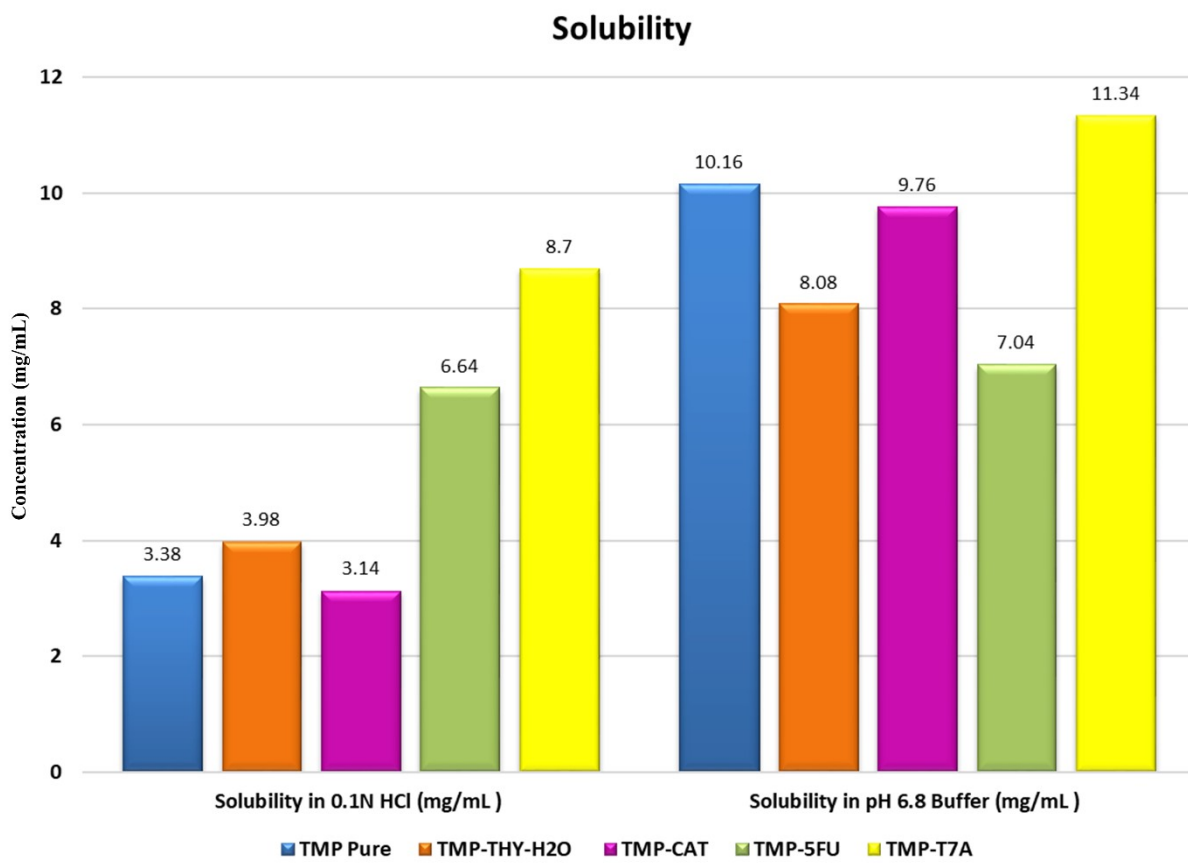

**Fig.S26** The solubility data of TMP-API and four crystal systems performed in water, 0.1N HCl and pH 6.8 Buffer.

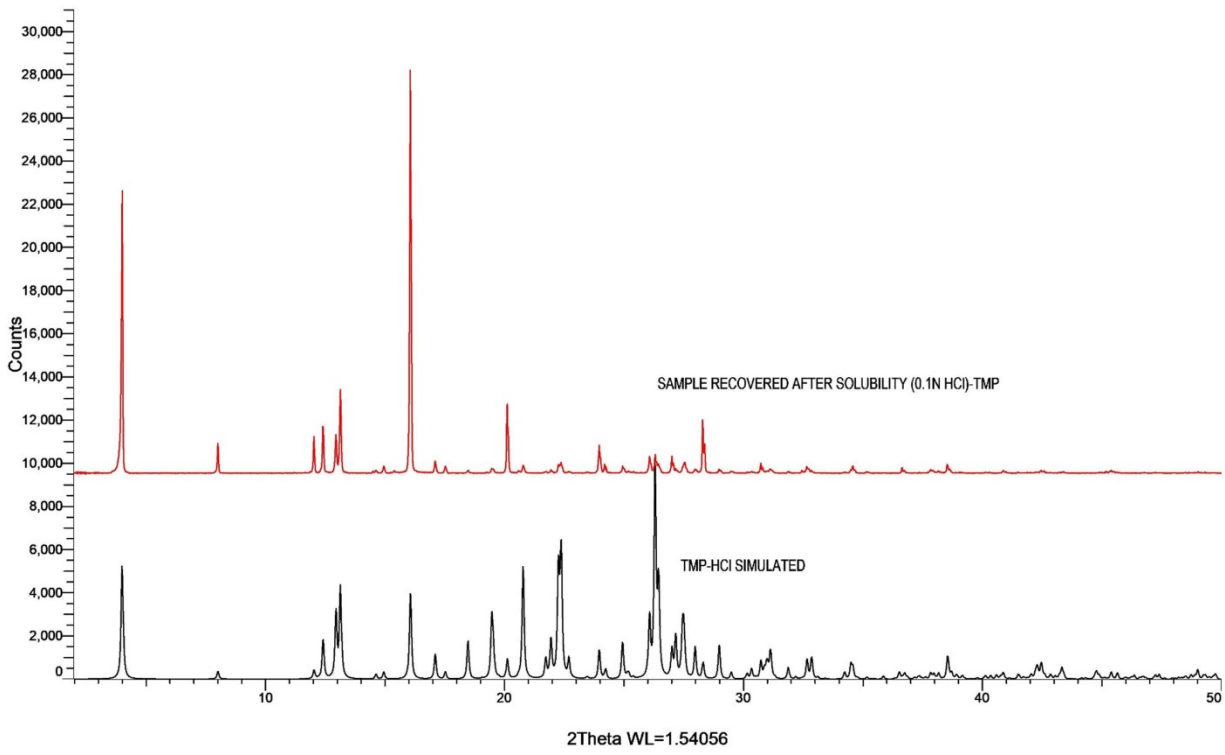

**Fig.S27** PXRD overlay of TMP residue recovered from 0.1N HCl after 24hr.

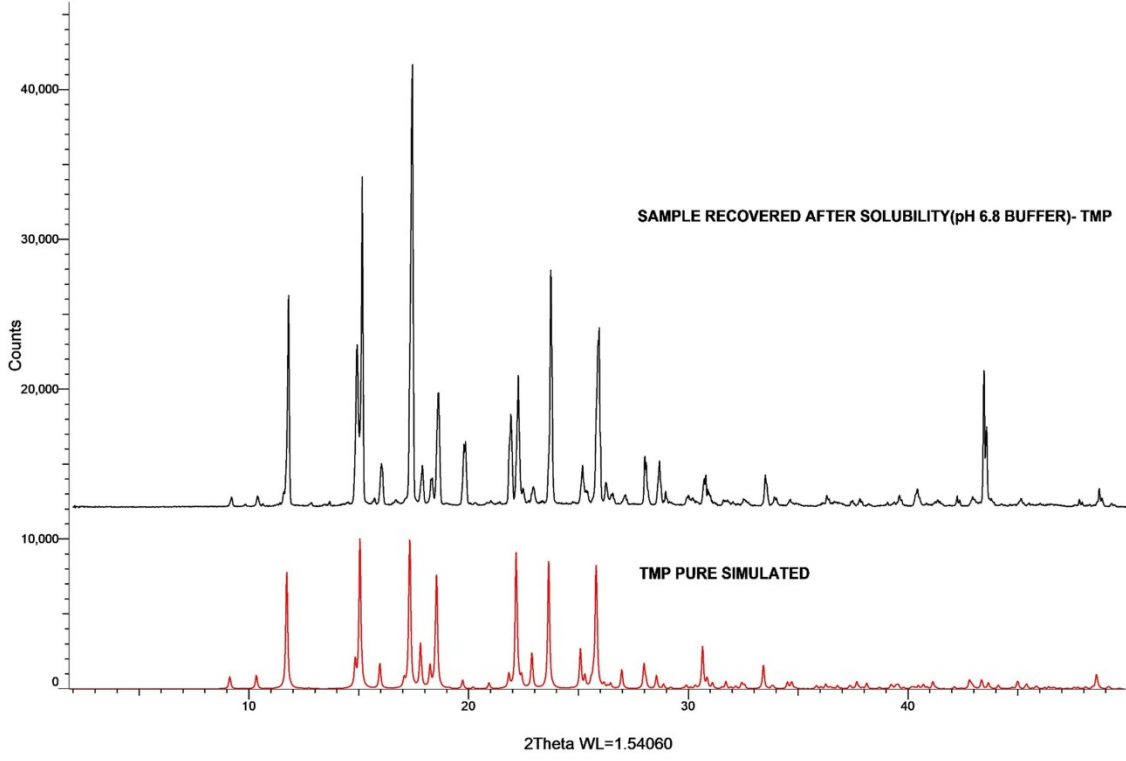

**Fig.S28** PXRD overlay of TMP residue recovered from pH 6.8 buffer after 24hr.

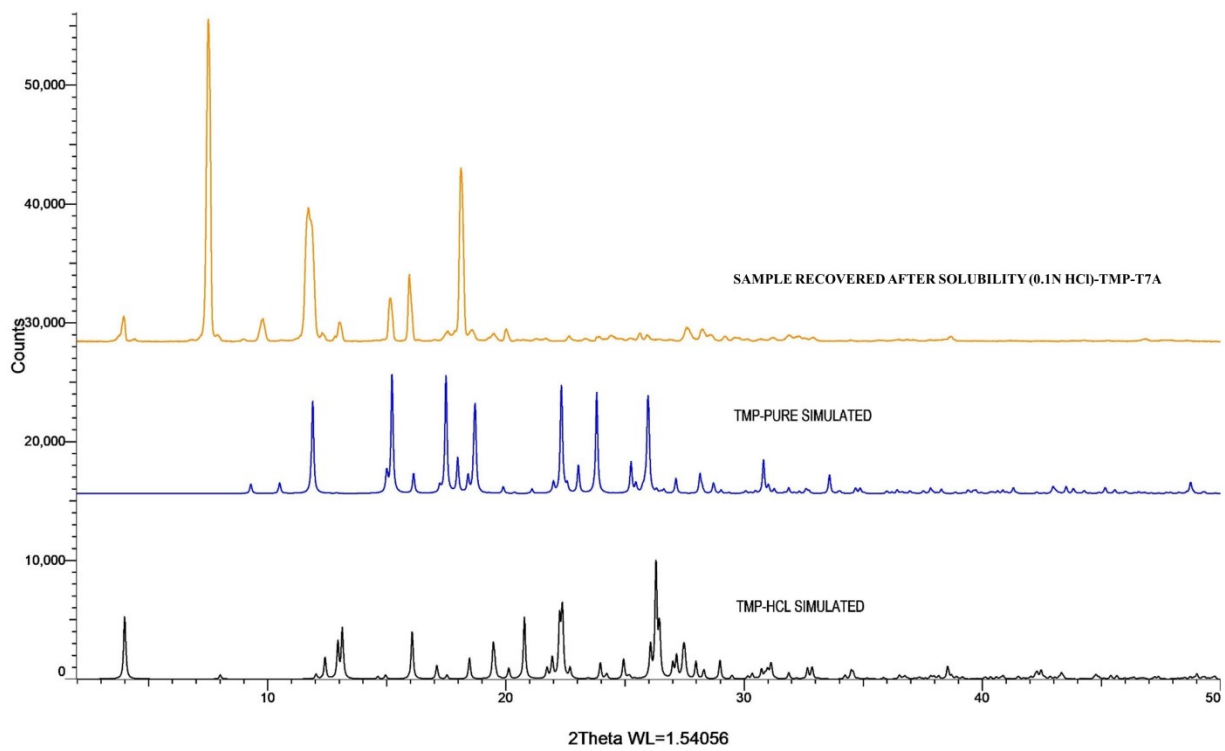

**Fig.S29** PXR overlay of TMP-T7A residue recovered from 0.1N HCl after 24hr.

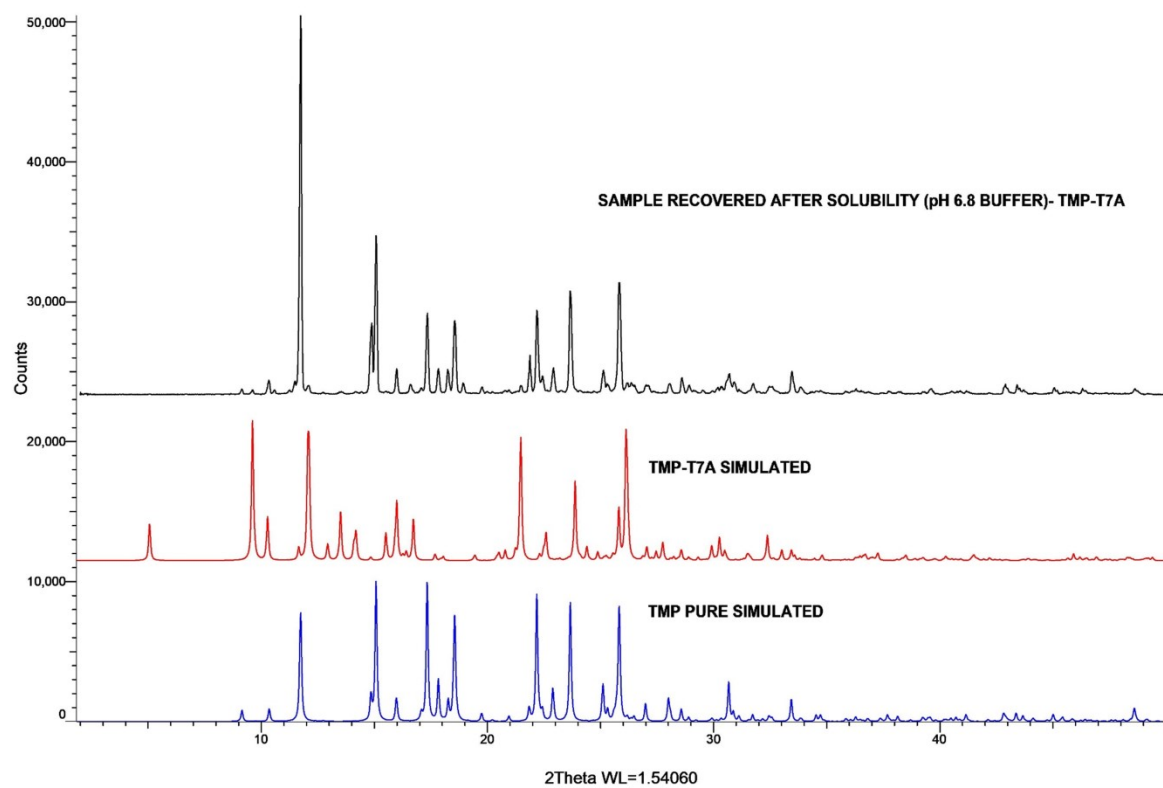

**Fig.S30** PXRD overlay of TMP-T7A residue recovered from pH 6.8 buffer after 24hr.

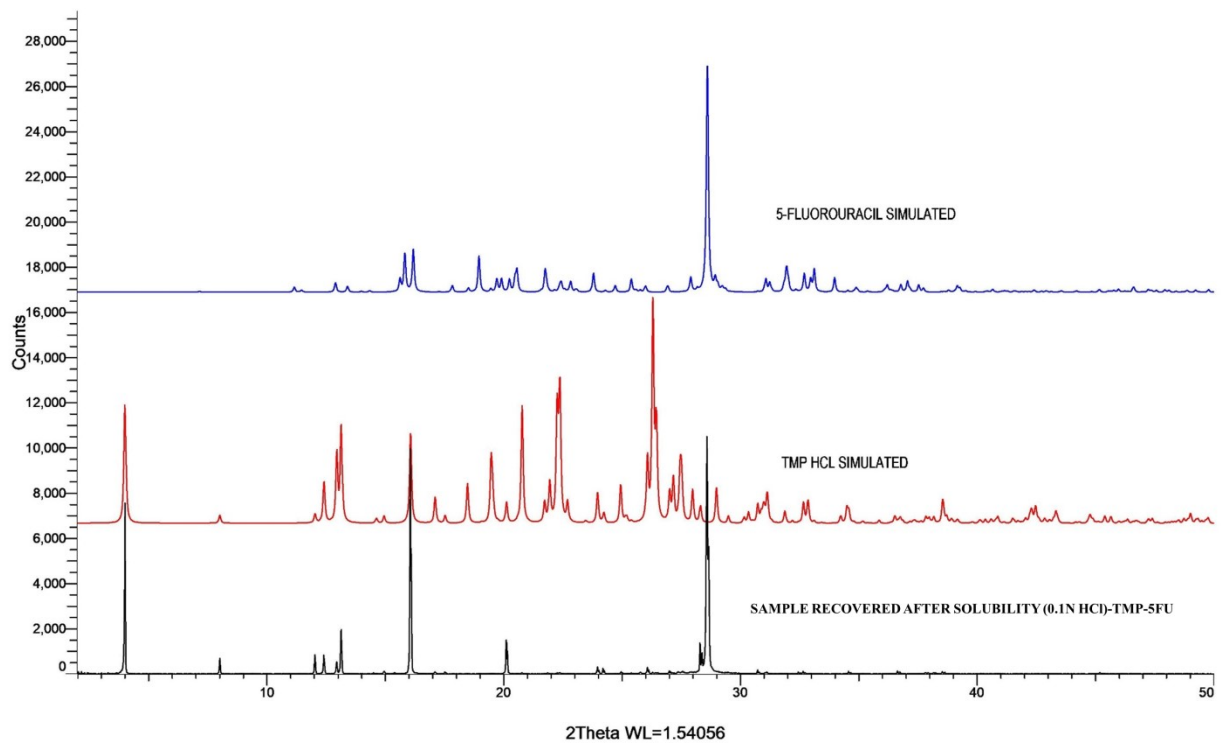

**Fig.S31** PXR overlay of TMP-5FU residue recovered from 0.1N HCl after 24hr.

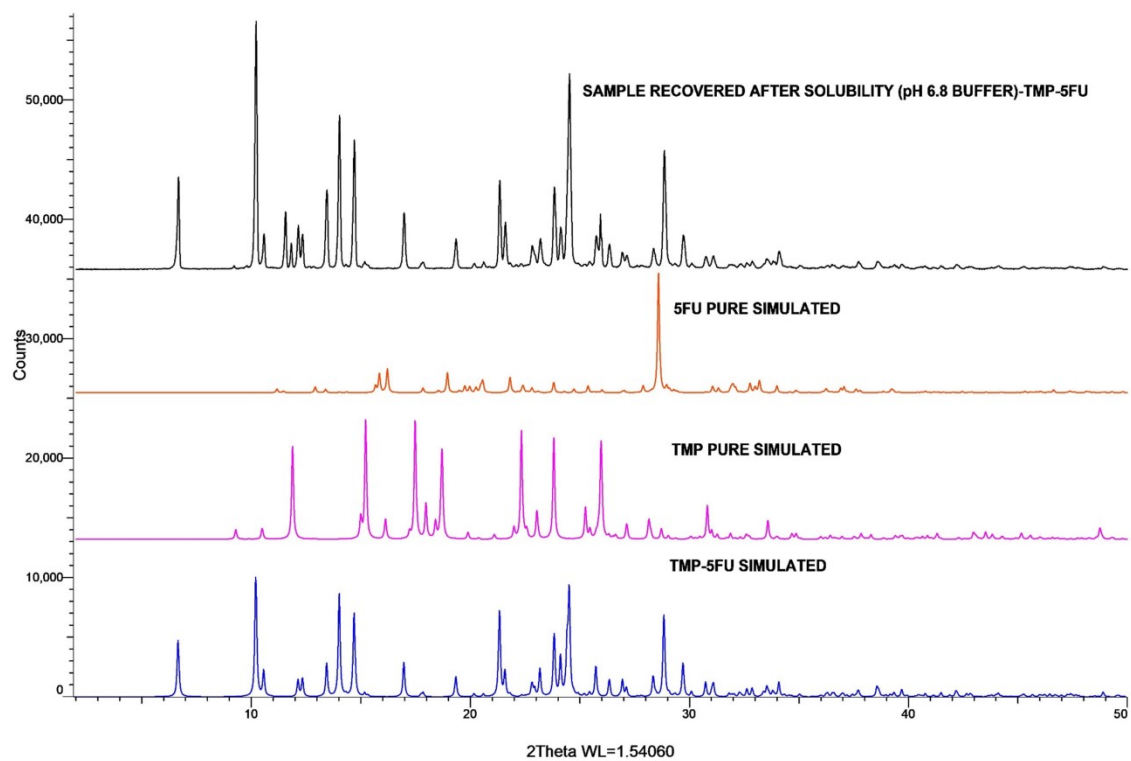

**Fig.S32** PXRD overlay of TMP-5FU residue recovered from pH 6.8 buffer after 24hr.



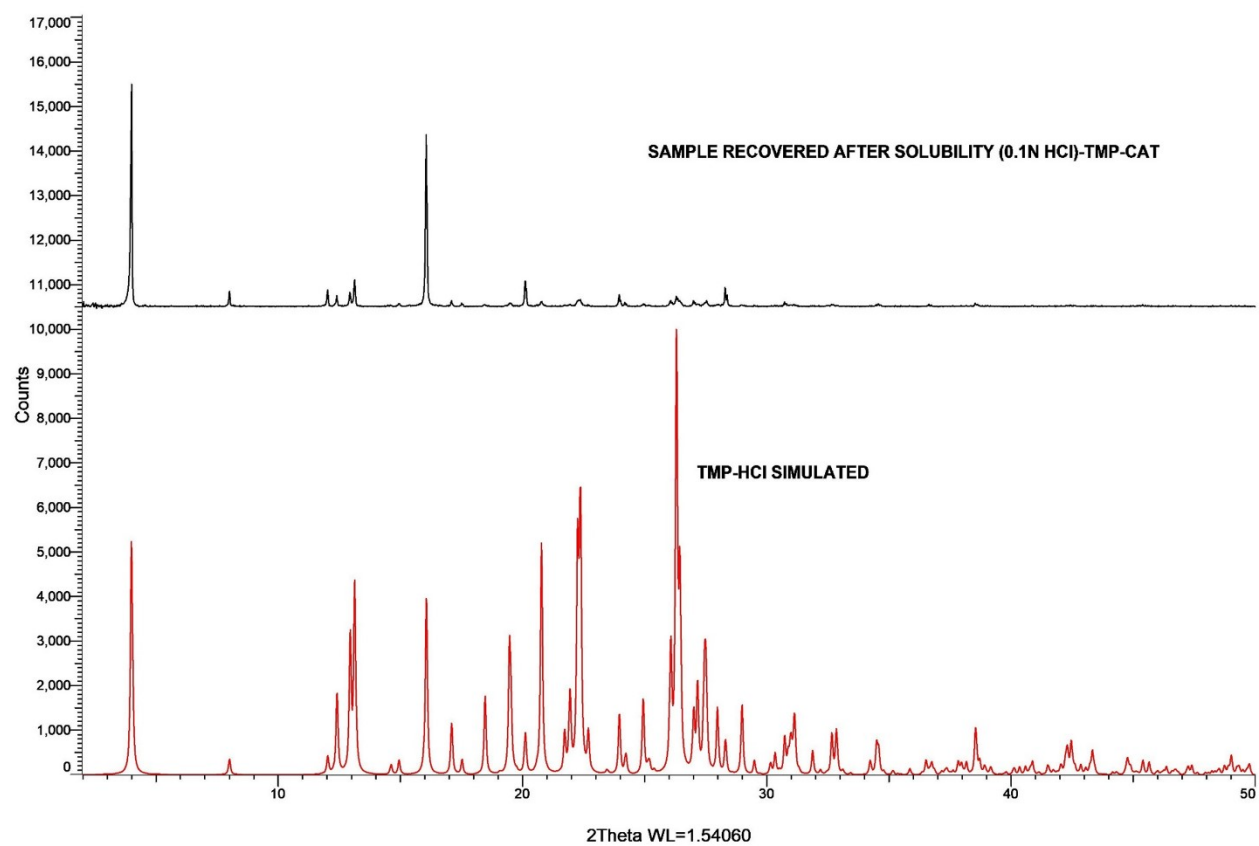

**Fig.S33** PXRD overlay of TMP-CAT residue recovered from 0.1N HCl after 24hr.

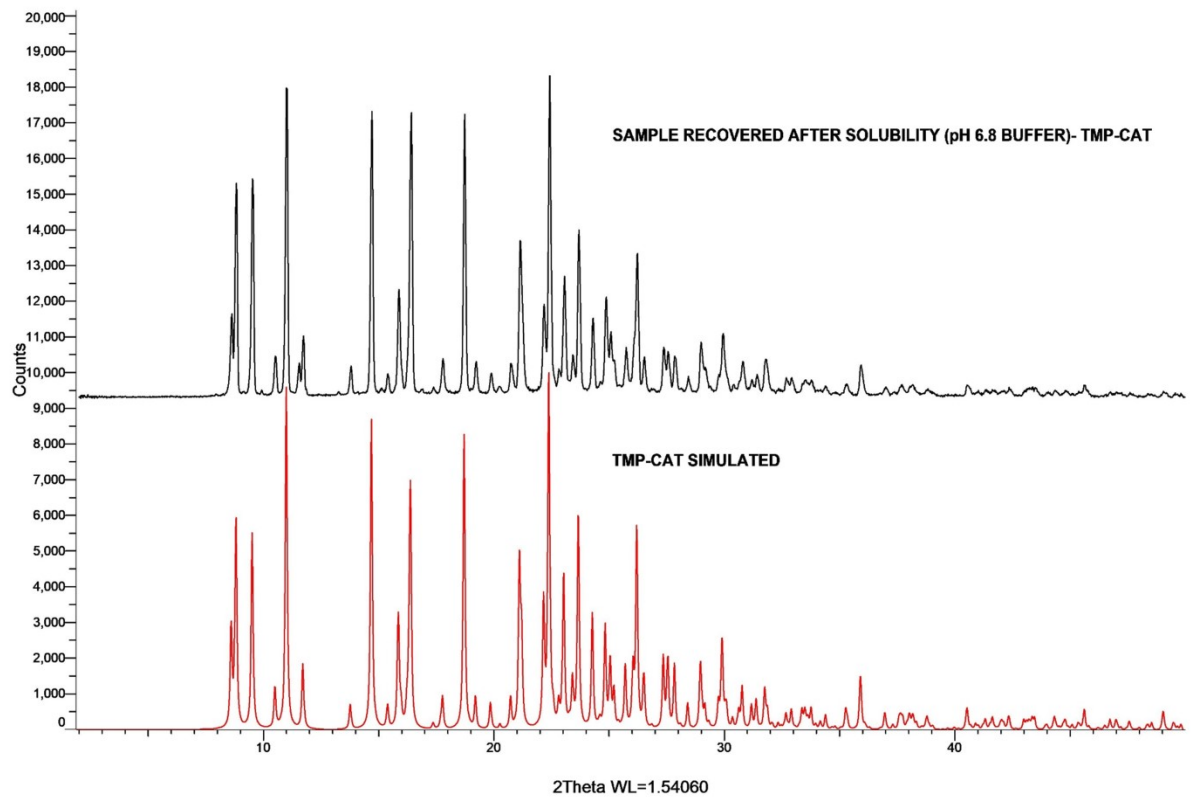

**Fig.S34** PXRD overlay of TMP-CAT residue recovered from pH 6.8 buffer after 24hr.

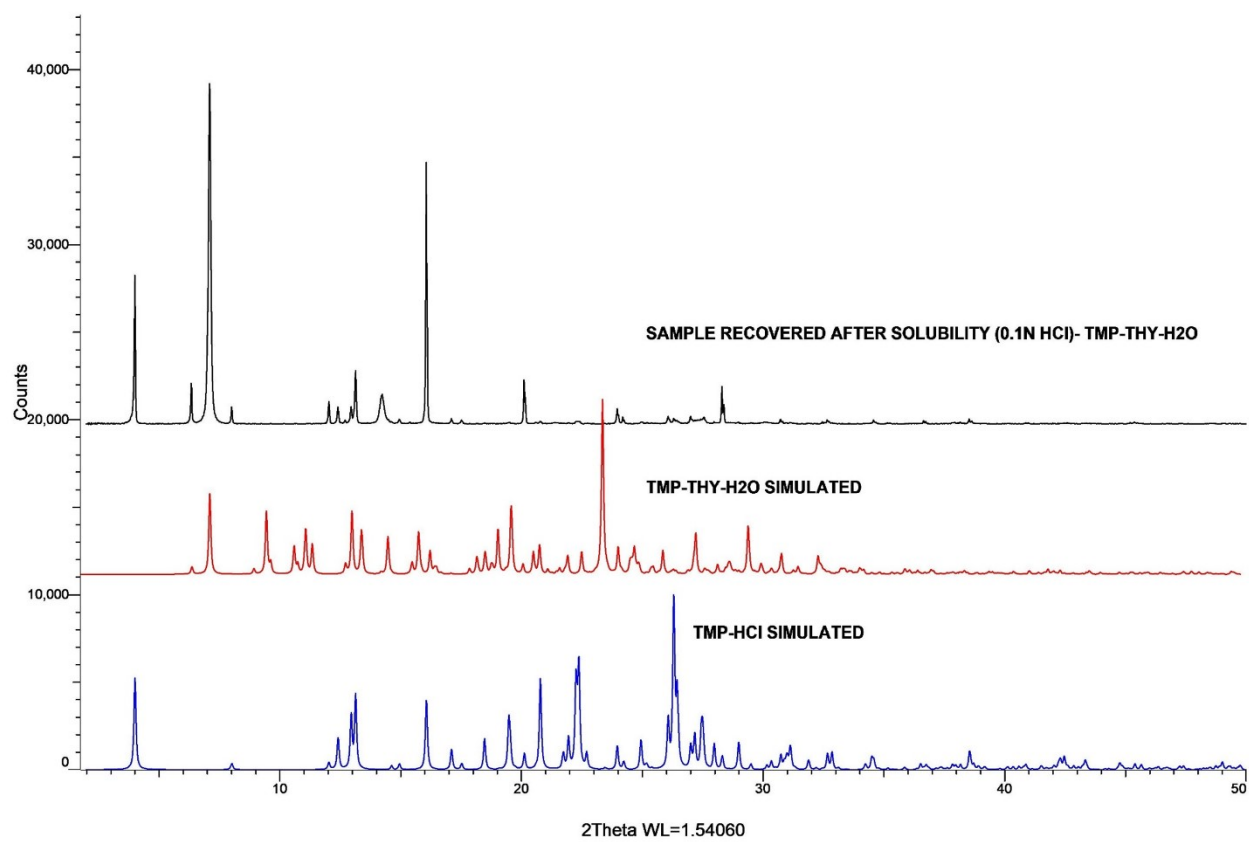

**Fig.S35** PXRD overlay of TMP-THY-H<sub>2</sub>O residue recovered from 0.1N HCl after 24hr.

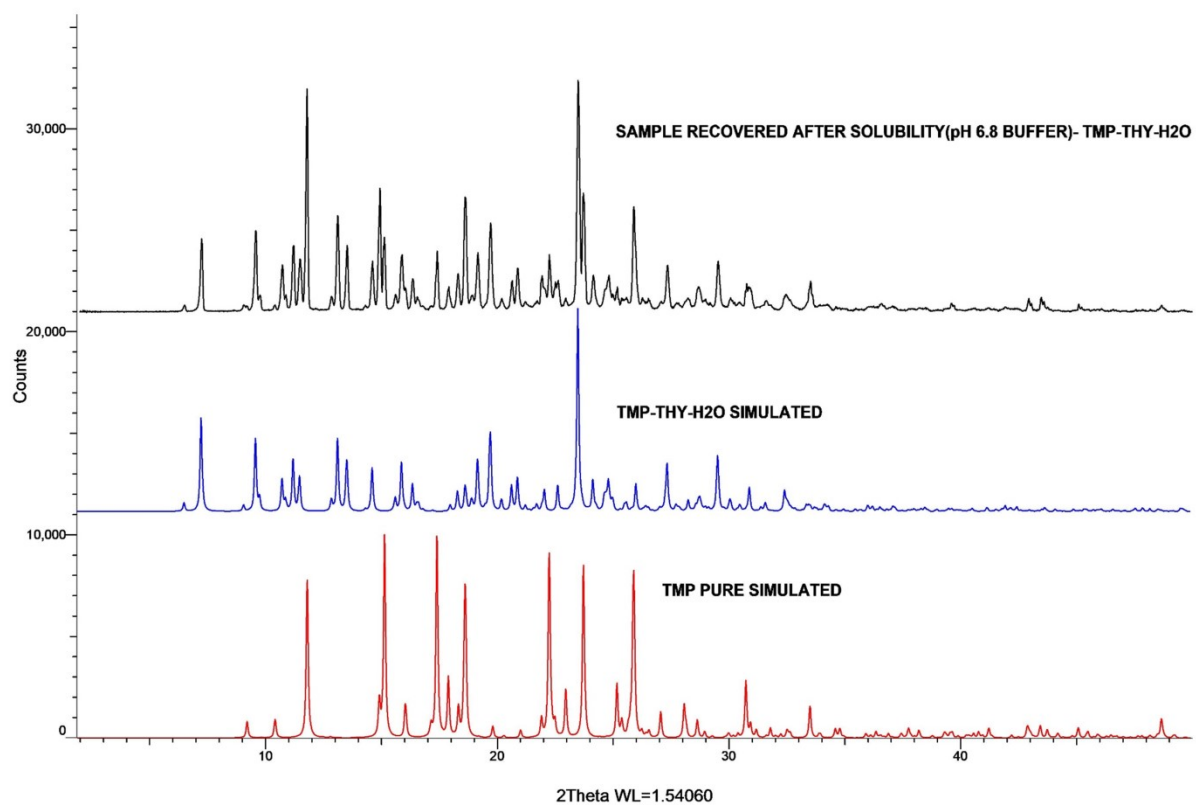

**Fig.S36** PXRD overlay of TMP-THY-H<sub>2</sub>O residue recovered from pH 6.8 buffer after 24hr.
